# Supplementary material for: Non-coding RNA LINC00857 is predictive of poor patient survival and promotes tumor progression via cell cycle regulation in lung cancer
Source: PubMed Central journal article supplement (PMC4905488; doi:10.18632/oncotarget.7203), 2016-02-05
Supplement: oncotarget-07-11487-s001.pdf [file oncotarget-07-11487-s001.pdf]

## Non-coding RNA *LINC00857* is predictive of poor patient survival and promotes tumor progression via cell cycle regulation in lung cancer

### Supplementary Materials

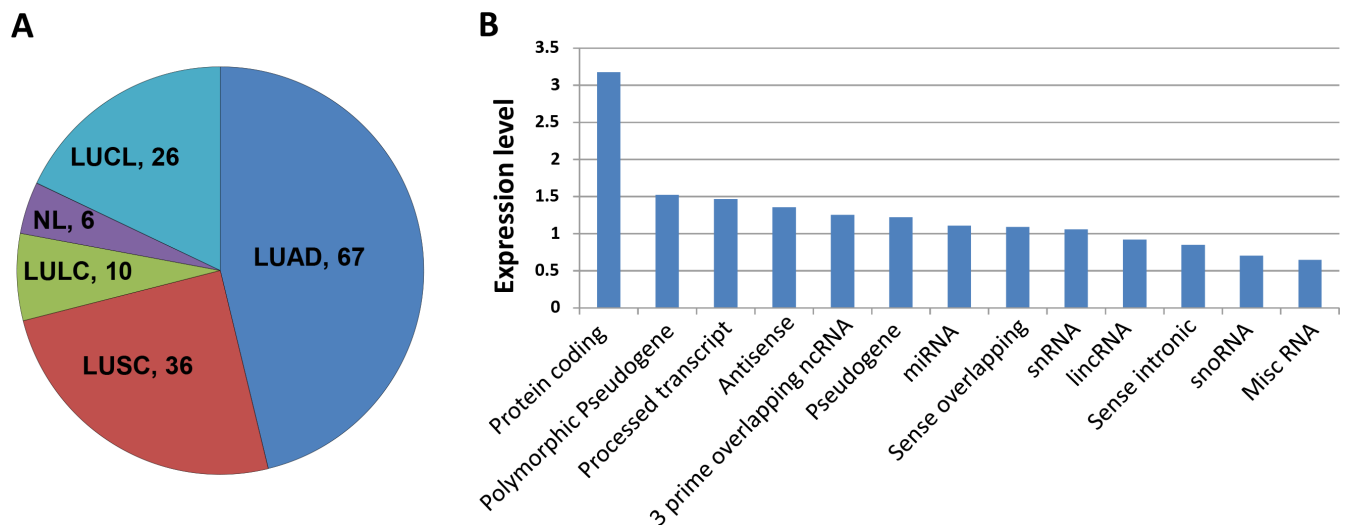

**Supplementary Figure S1:** (A) Samples composition of the university of michigan RNA-Seq cohort in this study. LUAD: lung adenocarcinoma, LUSC: lung squamous cell, LULC: lung large cell, NL: normal lung, LUCL: lung cell line. (B) The comparison of the RNA expression between protein coding genes and non-coding RNAs. Log<sub>2</sub> FPKM value.

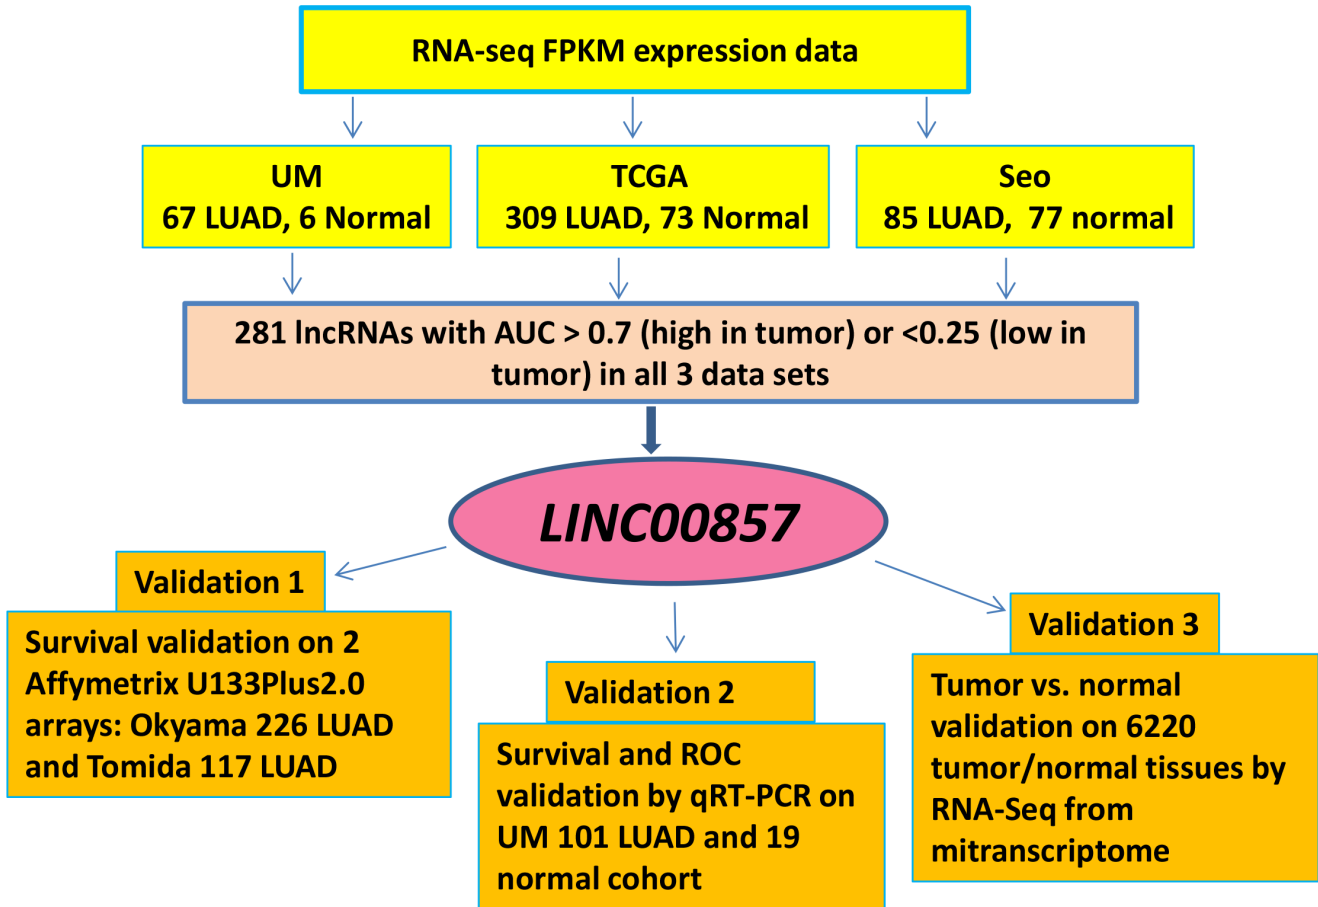

Supplementary Figure S2: A schematic flow chart of the discovery and validation of *LINC00857* in lung cancer.

182 lncRNAs were higher in LUAD (vs. normal) with AUC > 0.7 in all 3 data sets

99 lncRNAs were lower in LUAD (vs. normal) with AUC < 0.25 in all 3 data sets

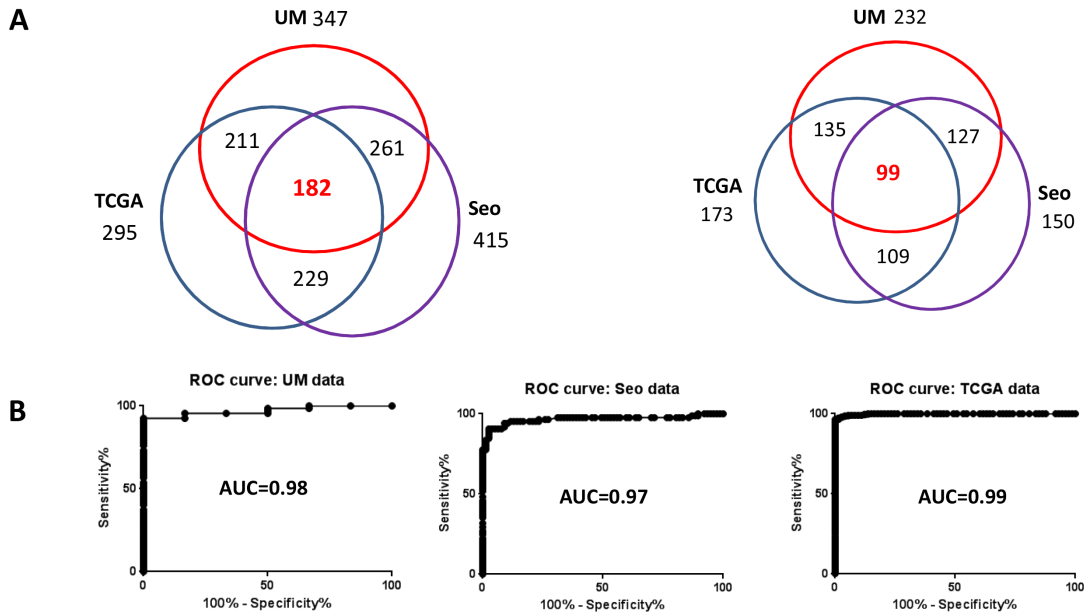

**Supplementary Figure S3: (A)** Selection of 281 lncRNAs based on AUC on all 3 RNA-Seq data sets. Number of lncRNAs in each group is indicated **(B)** Representative ROC curves of one lncRNA in 3 data sets.

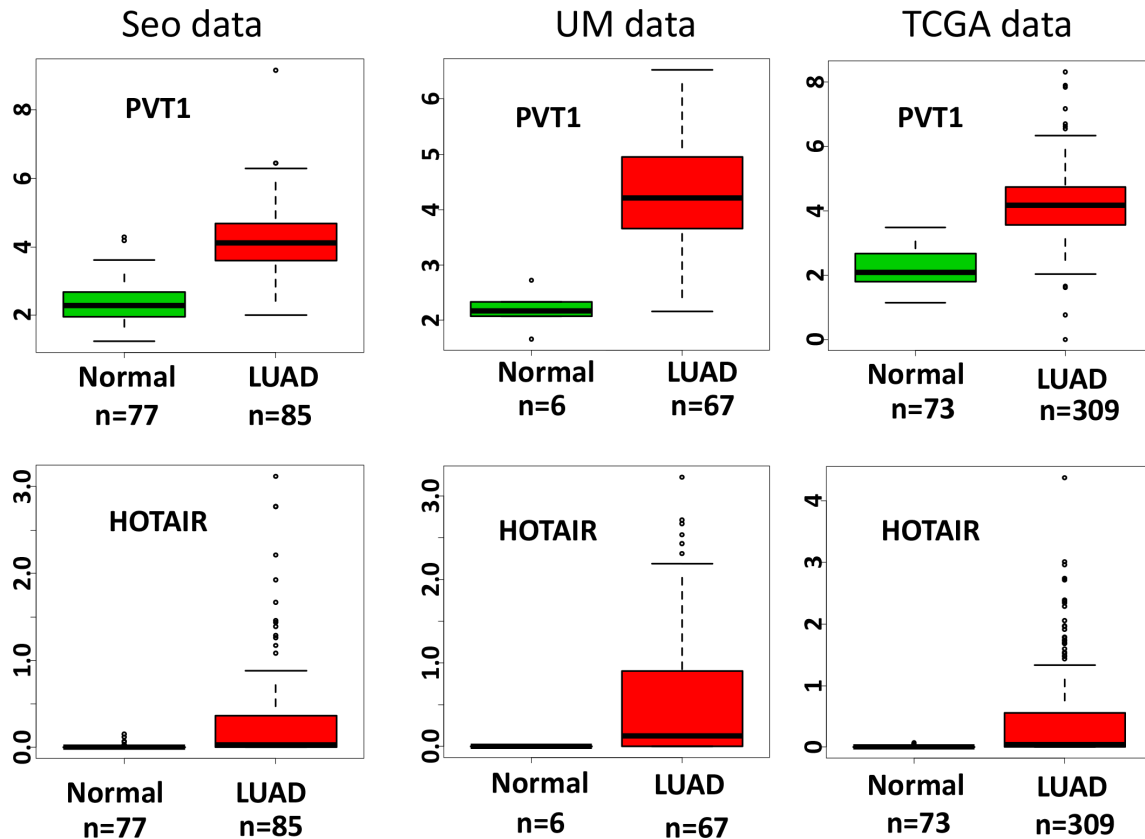

**Supplementary Figure S3C: Representative of boxplot for two known lung cancer-associated lncRNAs, PVT1 and HOTAIR, in 3 RNA Seq data sets ( $p < 0.001$ ).**

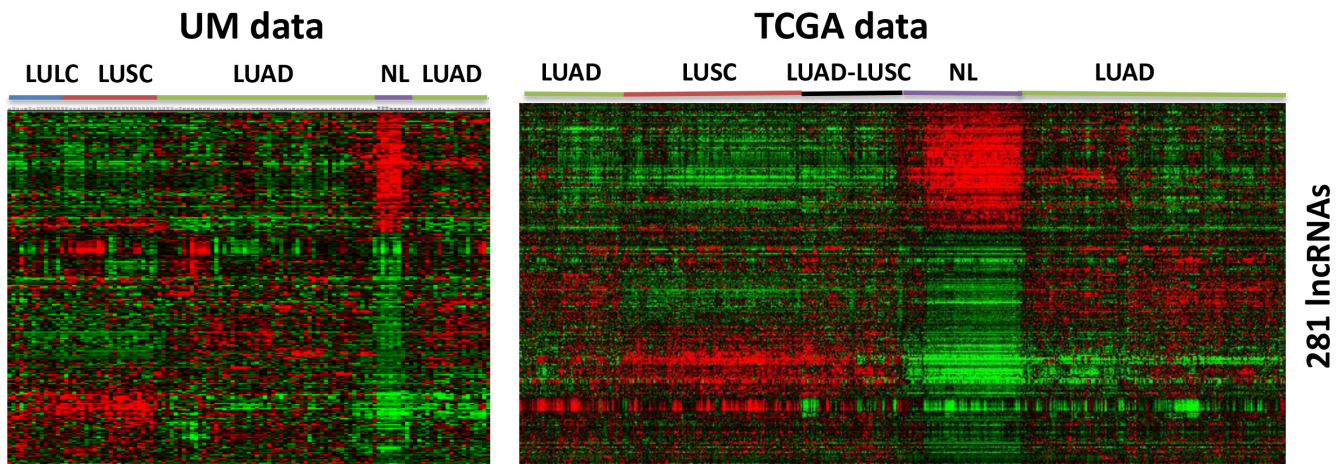

**Supplementary Figure S4:** (left panel) Expression pattern of 281 lncRNAs in UM 119 samples including 10 large cell lung cancers (LULC), 36 squamous cell lung cancers (LUSC), 67 lung adenocarcinomas (LUAD) and 6 normal lung tissues (NL). (right panel) Expression pattern of 281 lncRNAs in TCGA samples including 212 squamous cell lung cancers (SCC), 309 lung adenocarcinomas (AD) and 73 normal lung tissues (N).

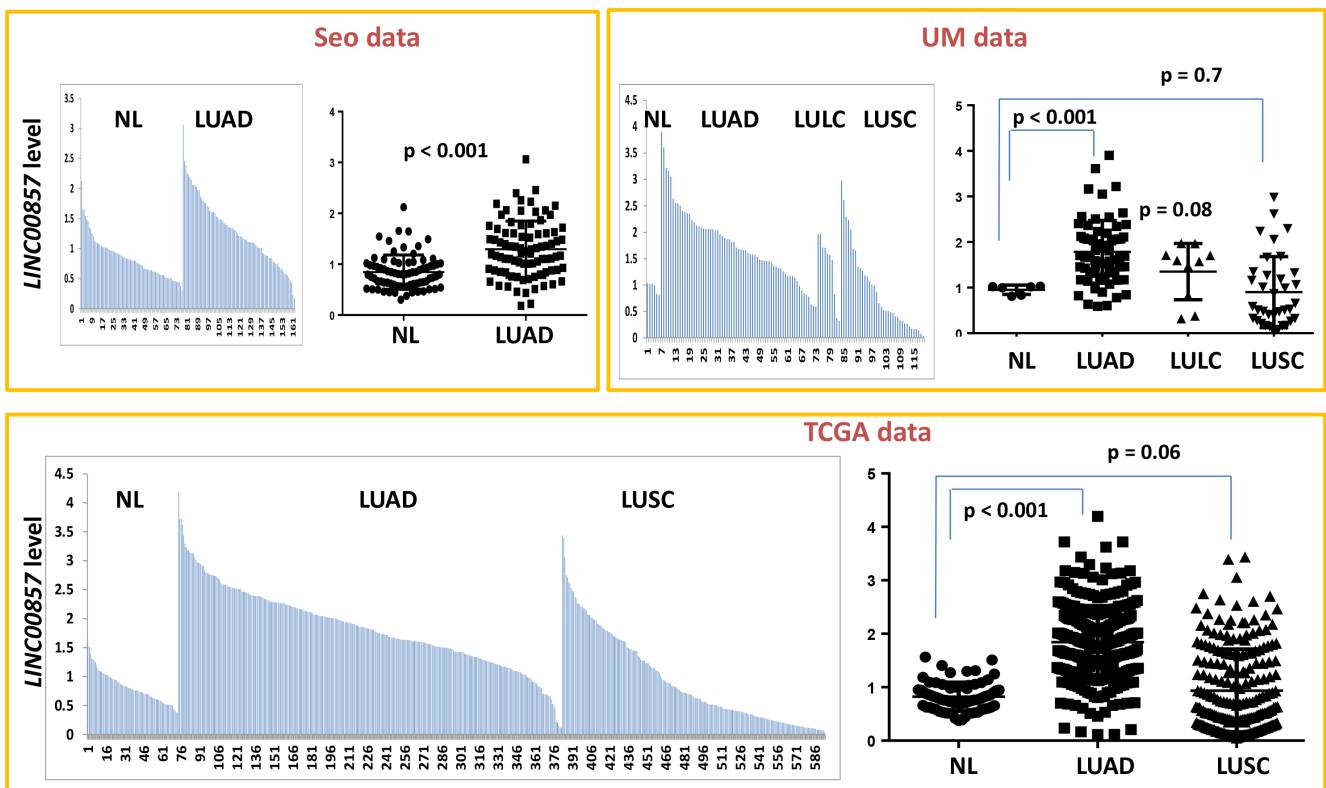

**Supplementary Figure S5:** Column and scatter plots of *LINC00857* expression level in all samples measured by RNA-seq (RPKM, log<sub>2</sub>) normal lung tissue, AD: adenocarcinoma, LC: large cell lung cancer, SCC: squamous cell lung cancer.

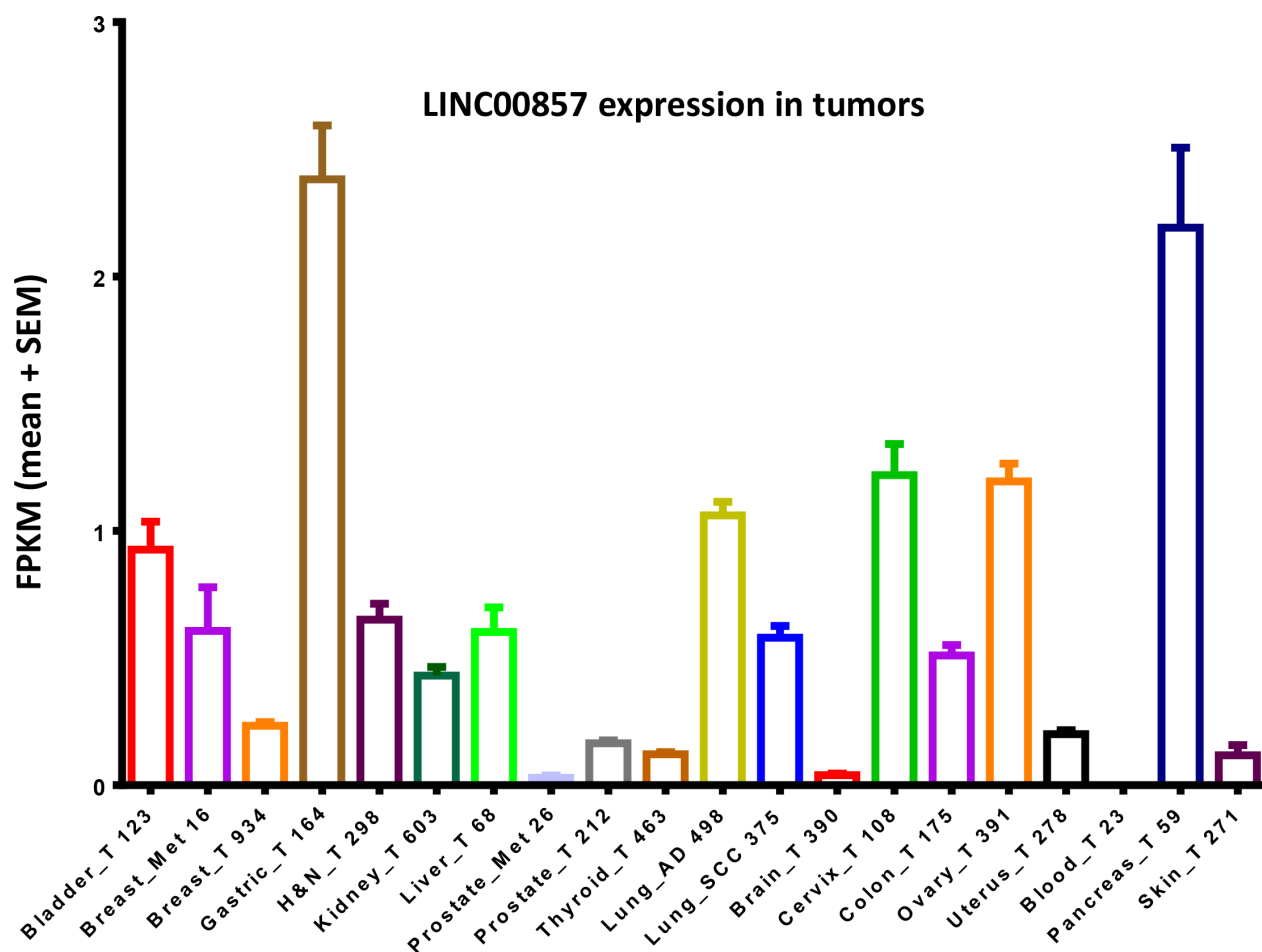

**Supplementary Figure S6A: *LINC00857* expression in different type of cancer (mean + SEM, FPKM log2 value).** High expression of *LINC00857* (FRKM log2 value > 0.5) were found in most type of cancers except prostate, thyroid, brain, blood and skin cancer (FRKM < 0.5). H & N, head and neck; AD, adenocarcinomas; SCC squamous cell cancer; case number of each cancer is indicated after T. The original data was download from <http://mitranscriptome.org>, with modification.

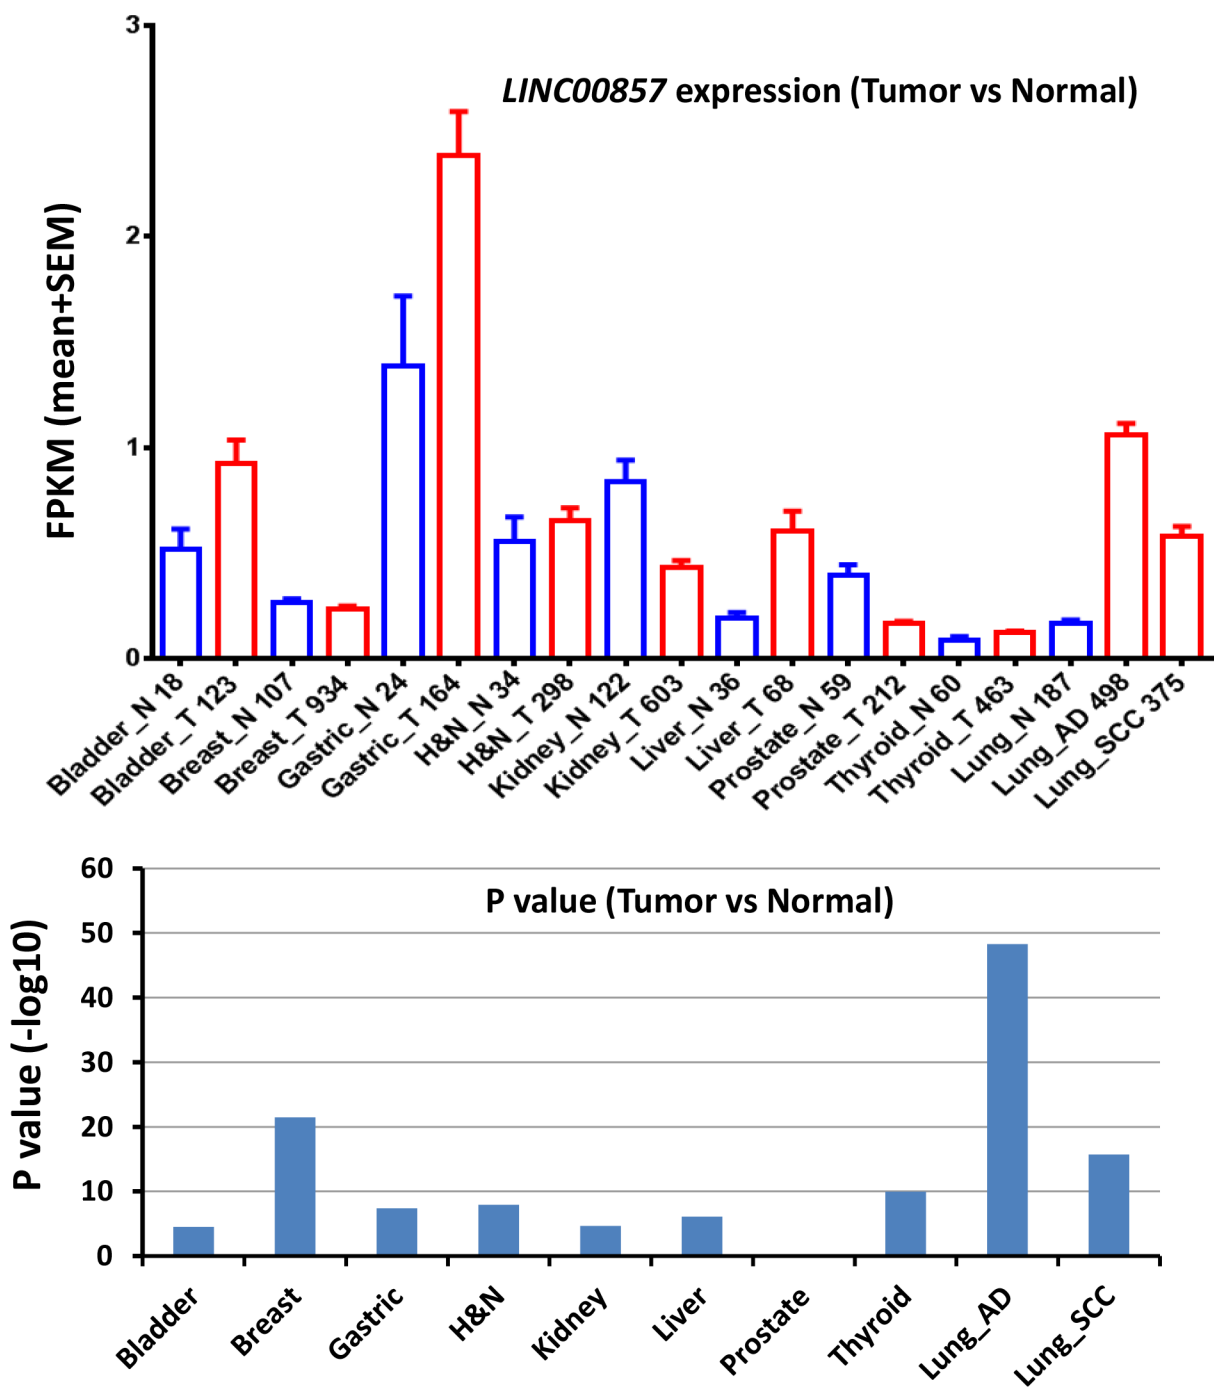

Supplementary Figure S6B: (Up panel), comparison of *LINC00857* expression in cancers (red) and its normal (blue) tissues (mean + SEM, FPKM, log<sub>2</sub>). Bladder, gastric, head & neck, liver, thyroid and lung cancer are significantly increased, whereas breast, kidney and prostate cancer are decreased (vs. normal). Case number of each cancer is indicated. The original data was downloaded from mitranscriptome, with modification. (Bottom panel), *p* value (-log<sub>10</sub>) of tumor vs. normal for each type of cancer in A. Lung AD is the most significant one in term of *p* value (vs. normal, *t* test).

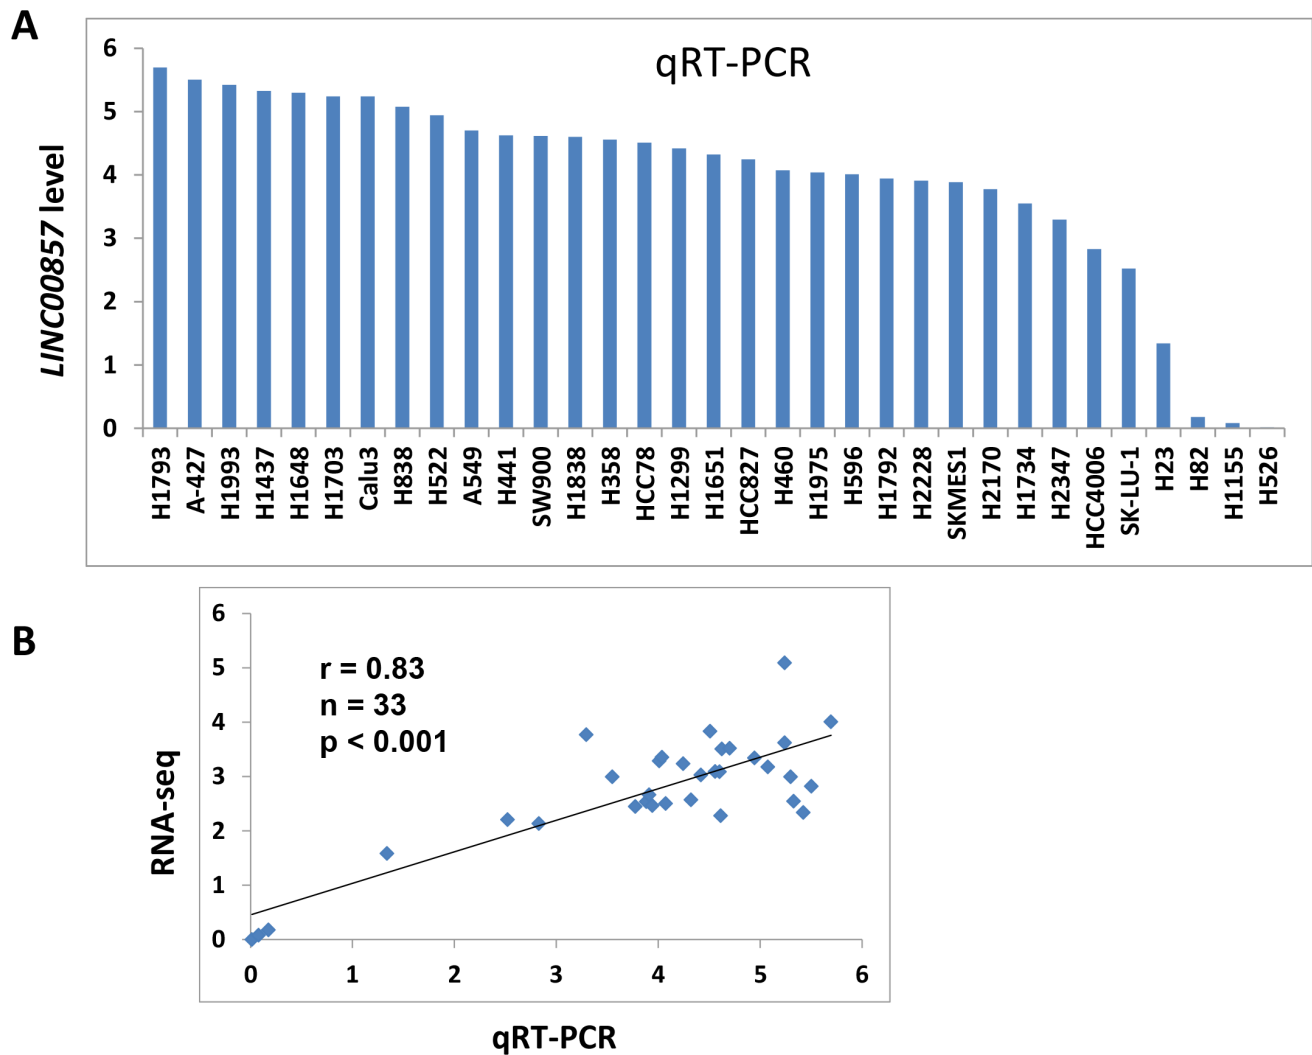

**Supplementary Figure S7: *LINC00857* expression in 33 lung cancer cell lines.** (A) *LINC00857* expression in 33 lung cell lines measured by qRT-PCR (log<sub>2</sub> of relative to mean value). (B) Significantly positive correlation of *LINC00857* level measured by RNA-Seq (log<sub>2</sub> of FPKM value) and RT-PCR based on 33 lung cancer cell lines.

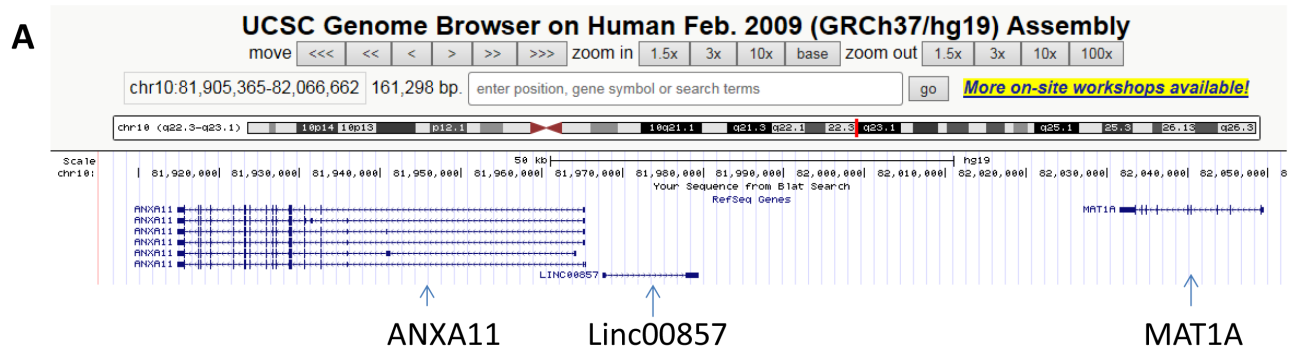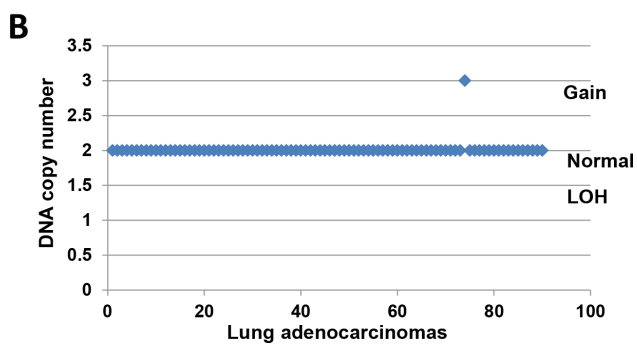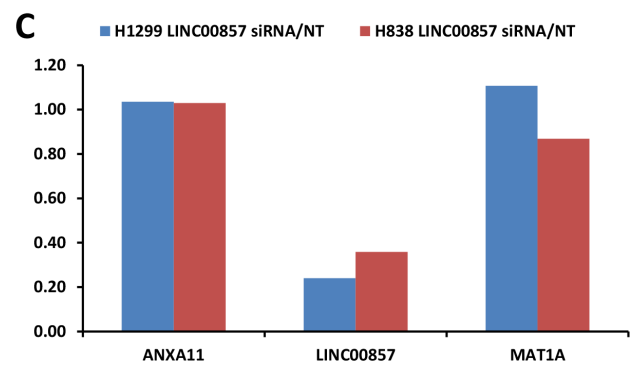

**Supplementary Figure S8: (A)** *LINC00857* neighbor genes *ANXA11* and *MAT1A*. **(B)** No amplification of *LINC00857* region was found as determined by Affymetrix SNP6.0 analysis on 90 lung adenocarcinomas. **(C)** Knockdown of *LINC00857* by siRNA did not affect gene expression levels of neighboring genes.



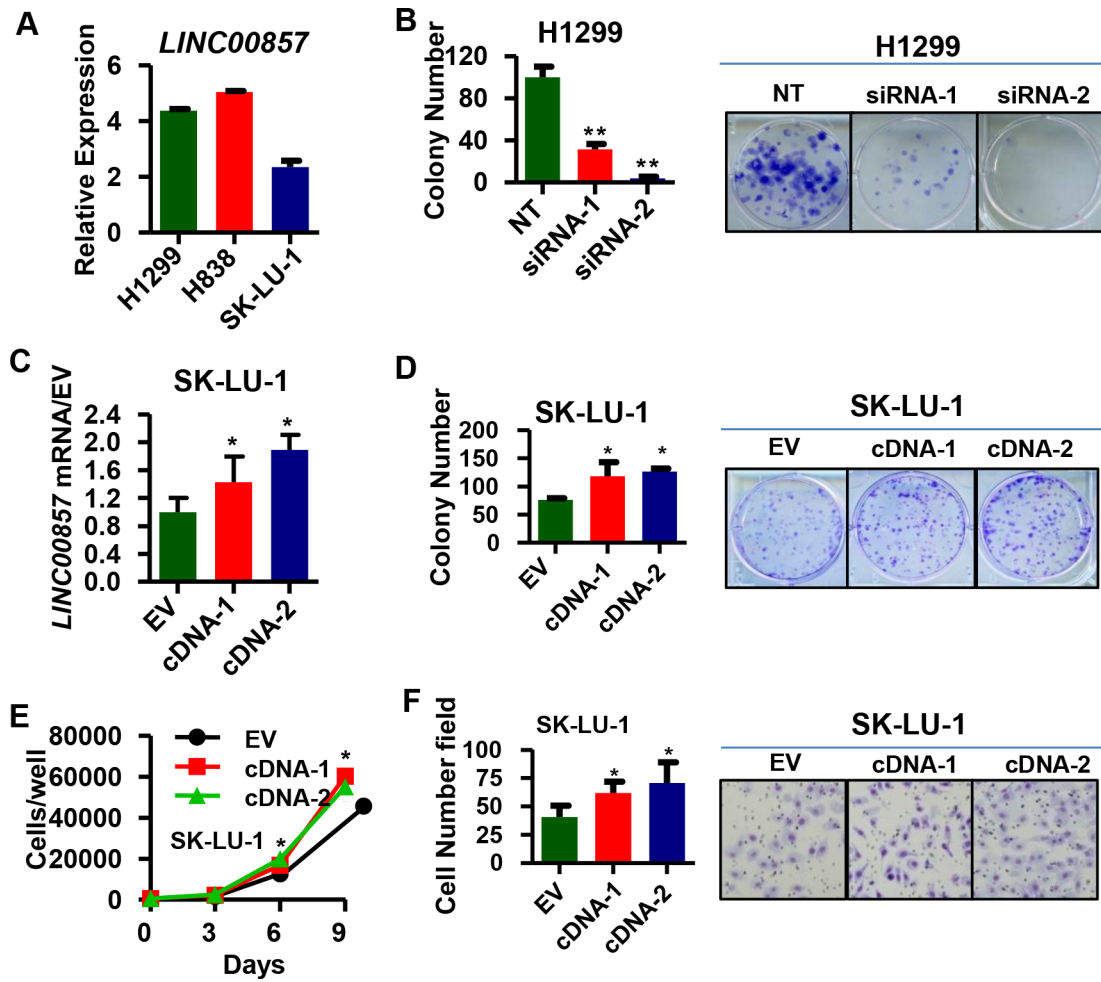

**Supplementary Figure S9:** (A) The relative levels of *LINC00857* in 3 LUAD cells (H838, H1299 and SK-LU-1). (B) Significantly decreased colony formation in *LINC00857* siRNA treated H1299 cells compared with NT Controls. \*\* $p < 0.01$ . (C) Quantitative verification of *LINC00857* overexpression constructs in SK-LU-1 cells measured qRT-PCR. \* $p < 0.05$ . (D) Increased colony formation ability after *LINC00857* overexpression compared to empty vector (EV) control. (E) Cell proliferation was increased upon overexpression of *LINC00857* in SK-LU-1 cells. \* $p < 0.05$ . (F) Cell invasion was increased after overexpression of *LINC00857* measured by Boyden chamber matrigel assays.

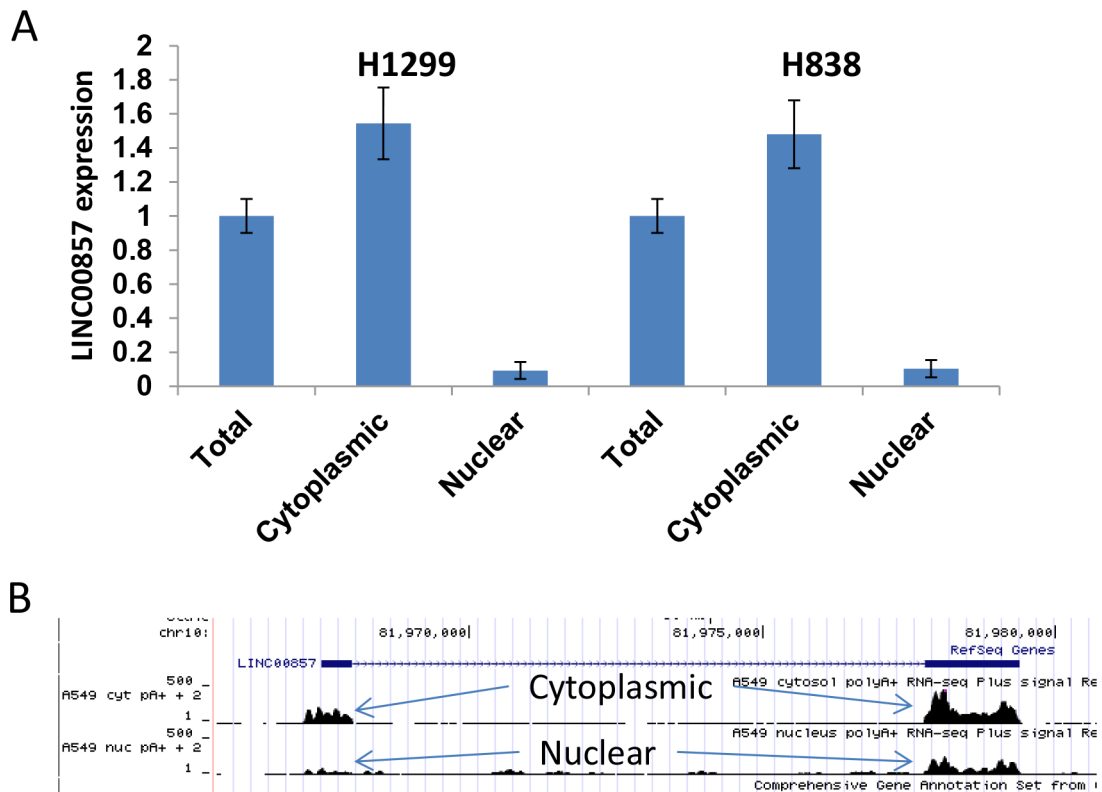

**Supplementary Figure S10: (A)** *LINC00857* is enriched in the cytoplasmic fraction in both H1299 and H838 cell lines measured by qRT-PCR. **(B)** Cytoplasmic enrichment of *LINC00857* in A549 measured by RNA-Seq from Encode (downloaded from UCSC browser).

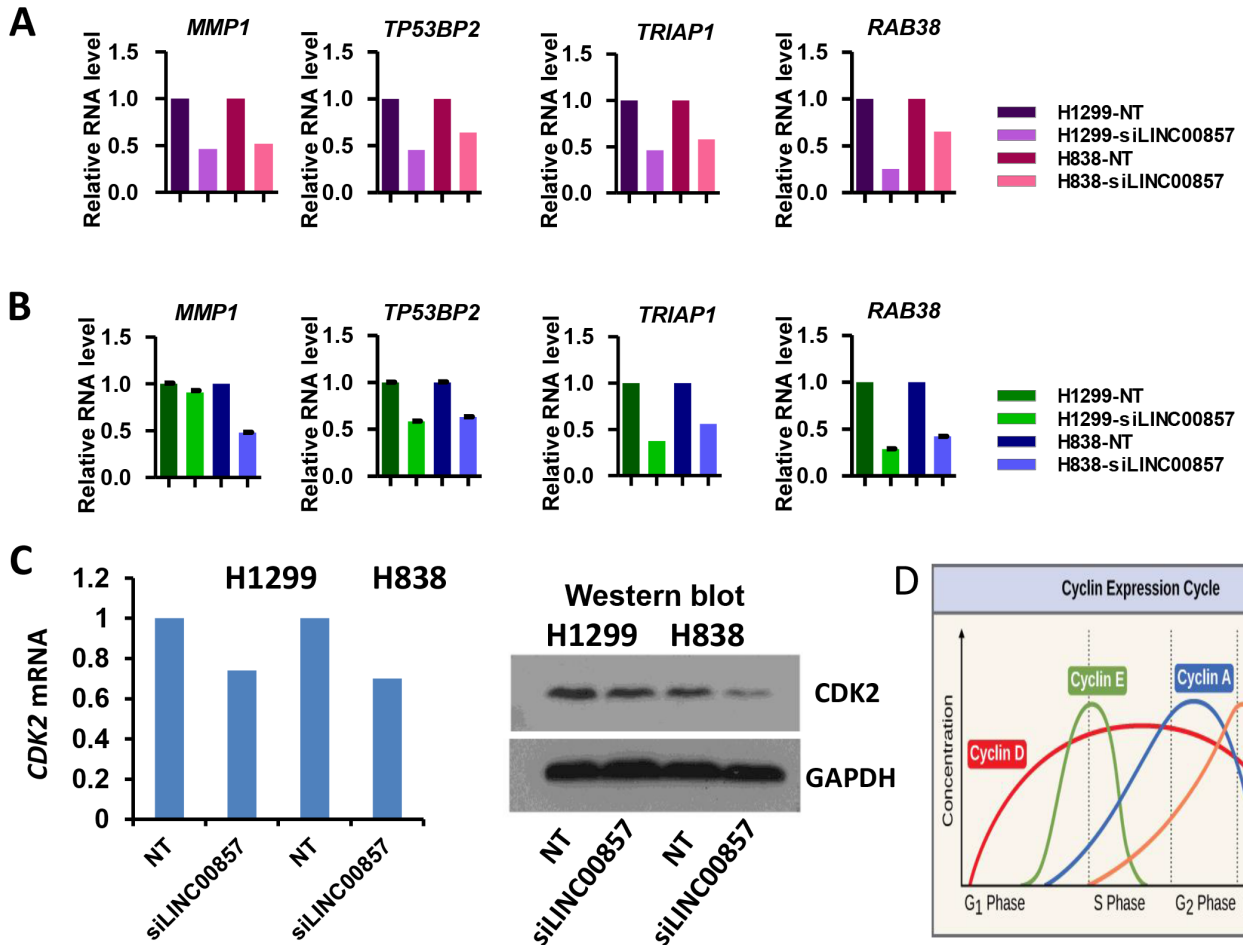

**Supplementary Figure S11:** (A) The expression of four genes measured by Affymetrix ST2.1 exon microarray in *LINC00857* siRNA and NT treatment on H1299 and H838 cell lines. (B) qRT-PCR validation of these 4 genes. (C) CDK2 mRNA (left) was decreased by 30% after *LINC00857* siRNA knockdown. CDK2 protein (right) was decreased on H838. (D) Cyclin concentrations at checkpoints. CCNE1 is highest in G<sub>1</sub> to S phase (figure source: www.boundless.com).

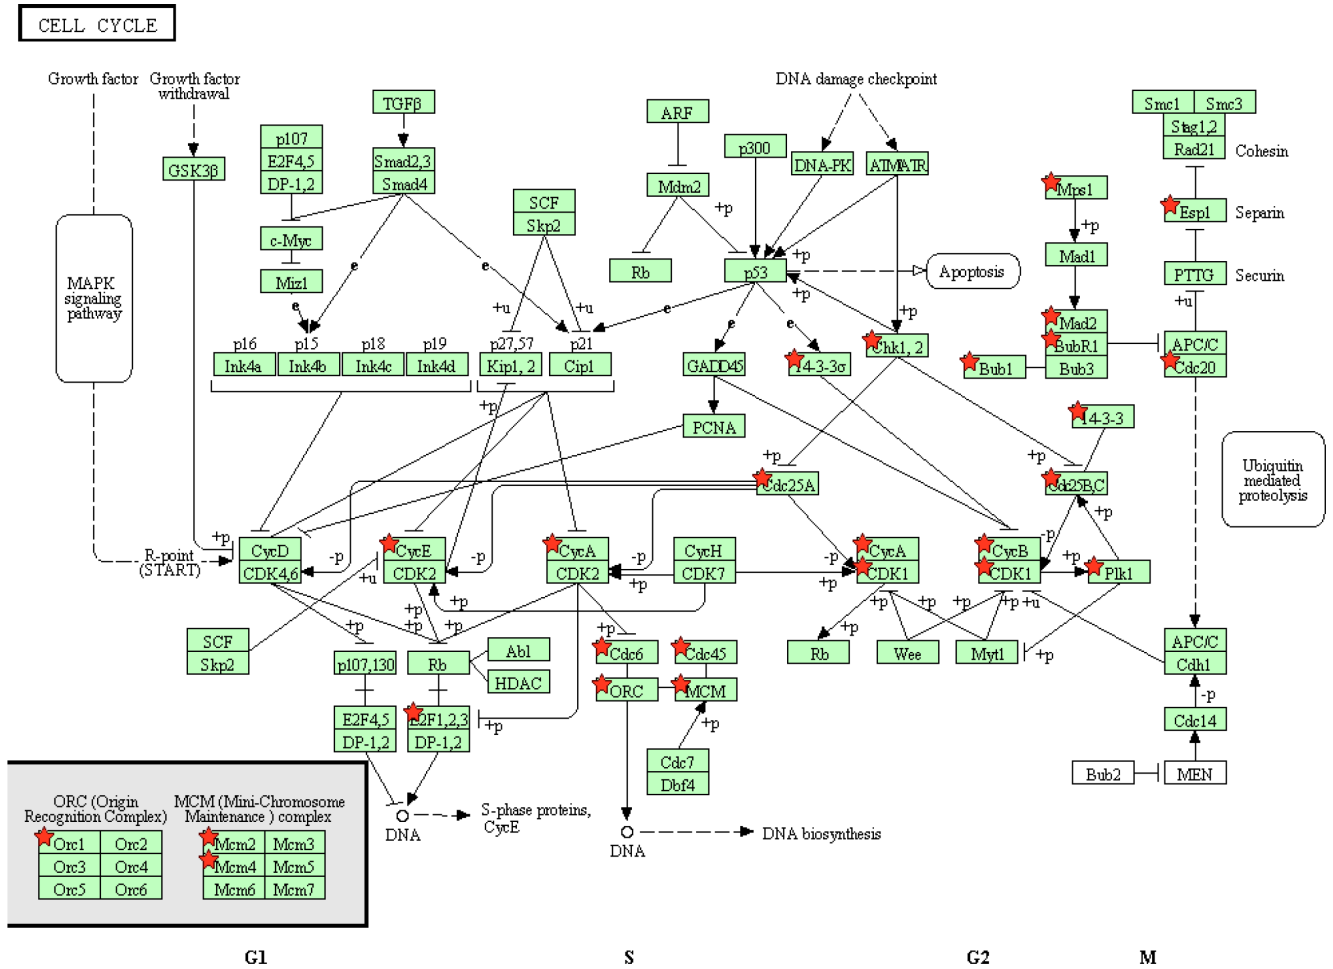

**Supplementary Figure S12: Pathway analysis of *LINC00857* positively correlated genes.** Red star indicates genes positively correlated to *LINC00857* expression in Okayama data set.

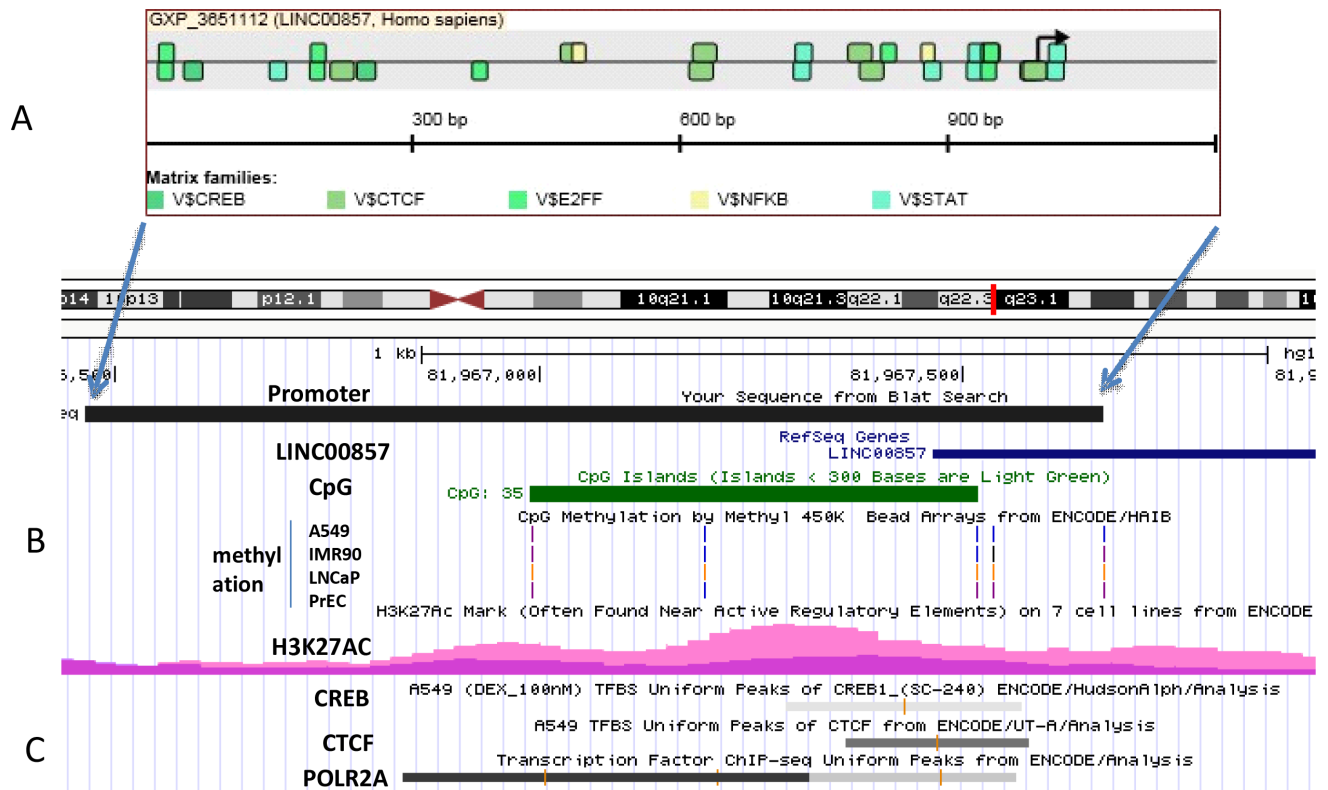

**Supplementary Figure S13: *LINC00857* promoter region reveals the presence of DNA binding elements for transcription factors (A and C), DNA methylation and histone acetylation (B).**

**Supplementary Table S1: Characteristics of 67 lung ADs measured by RNA-Seq**

| Variable              | Number |
|-----------------------|--------|
| Age average (yrs.)    | 67.1   |
| Gender                |        |
| Female                | 36     |
| Male                  | 31     |
| Stage                 |        |
| Stage I               | 32     |
| Stage II              | 21     |
| Stage III             | 14     |
| Differentiation       |        |
| Well                  | 14     |
| Moderate              | 28     |
| Poor                  | 23     |
| NA                    | 2      |
| Survival status       |        |
| Dead (5 yrs.)         | 38     |
| Alive                 | 29     |
| Median follow-up (m)* | 92     |
| Recurrence            |        |
| Yes                   | 31     |
| No                    | 36     |
| Adjuvant therapy      |        |
| Yes                   | 12     |
| No                    | 54     |
| unknown               | 1      |
| KRAS mutation         |        |
| Yes                   | 31     |
| No                    | 36     |
| EGFR mutation         |        |
| Yes                   | 25     |
| No                    | 42     |
| Number of mutations** |        |
| < 5                   | 27     |
| > = 5                 | 40     |
| average               | 4.8    |

\*among the patients that are still alive.

\*\*including 23 most common oncogenes and tumor suppressor genes.

**Supplementary Table S2: 281 lncRNAs with ROC > 0.7 or < 0.25 from 3 RNA-Seq data sets**

| Ensembl ID      | gene name   | type                   | data set  | UM   | Seo  | TCGA           | UM<br>67LUAD<br>5y | UM<br>67LUAD<br>5y |
|-----------------|-------------|------------------------|-----------|------|------|----------------|--------------------|--------------------|
|                 |             |                        | Sample ID | ROC  | ROC  | ROC            | univariate<br>cox  | univariate<br>cox  |
|                 |             |                        | AUC       | AUC  | AUC  | <i>p</i> value | beta               |                    |
| ENSG00000237523 | LINC00857   | processed_transcript   |           | 0.73 | 0.76 | 0.92           | 0.01               | 0.39               |
| ENSG00000223749 | AC004383.4  | processed_transcript   |           | 0.80 | 0.88 | 0.73           | 0.04               | -0.34              |
| ENSG00000258821 | AC005041.17 | antisense              |           | 0.91 | 0.87 | 0.84           | 0.40               | -0.13              |
| ENSG00000204380 | AC005042.4  | antisense              |           | 0.79 | 0.85 | 0.75           | 0.66               | -0.07              |
| ENSG00000267073 | AC005256.1  | lincRNA                |           | 0.81 | 0.71 | 0.76           | 0.43               | 0.13               |
| ENSG00000229647 | AC007879.7  | lincRNA                |           | 0.85 | 0.84 | 0.85           | 0.68               | -0.07              |
| ENSG00000267751 | AC009005.2  | antisense              |           | 0.82 | 0.85 | 0.83           | 0.05               | 0.37               |
| ENSG00000259972 | AC009120.6  | antisense              |           | 0.73 | 0.86 | 0.84           | 0.87               | -0.03              |
| ENSG00000238045 | AC009133.14 | antisense              |           | 0.77 | 0.86 | 0.84           | 0.20               | 0.24               |
| ENSG00000265840 | AC010761.10 | antisense              |           | 0.72 | 0.80 | 0.85           | 0.74               | 0.05               |
| ENSG00000265474 | AC010761.9  | antisense              |           | 0.93 | 0.90 | 0.78           | 0.92               | -0.02              |
| ENSG00000226853 | AC010894.3  | lincRNA                |           | 0.70 | 0.72 | 0.75           | 0.84               | 0.03               |
| ENSG00000236008 | AC011747.4  | lincRNA                |           | 0.84 | 0.86 | 0.72           | 0.88               | 0.02               |
| ENSG00000204588 | AC013268.5  | processed_transcript   |           | 0.83 | 0.84 | 0.71           | 0.30               | -0.17              |
| ENSG00000236753 | AC018642.1  | processed_transcript   |           | 0.71 | 0.71 | 0.79           | 0.18               | 0.22               |
| ENSG00000172965 | AC068491.1  | processed_transcript   |           | 0.81 | 0.75 | 0.83           | 0.05               | 0.32               |
| ENSG00000258725 | AC068831.8  | antisense              |           | 0.93 | 0.92 | 0.87           | 0.75               | 0.05               |
| ENSG00000234072 | AC074117.10 | antisense              |           | 0.97 | 0.91 | 0.81           | 0.64               | -0.08              |
| ENSG00000231560 | AC091814.3  | lincRNA                |           | 0.87 | 0.81 | 0.80           | 0.95               | 0.01               |
| ENSG00000235493 | AC092415.1  | lincRNA                |           | 0.86 | 0.89 | 0.82           | 0.83               | 0.03               |
| ENSG00000232164 | AC092669.3  | lincRNA                |           | 0.87 | 0.88 | 0.83           | 0.22               | 0.17               |
| ENSG00000231890 | AC093391.2  | antisense              |           | 0.84 | 0.87 | 0.86           | 0.51               | 0.10               |
| ENSG00000241181 | AC093734.13 | processed_transcript   |           | 0.89 | 0.93 | 0.89           | 0.18               | 0.23               |
| ENSG00000230838 | AC093850.2  | lincRNA                |           | 0.92 | 0.87 | 0.89           | 0.01               | 0.39               |
| ENSG00000265055 | AC145343.2  | lincRNA                |           | 0.84 | 0.86 | 0.91           | 0.44               | -0.13              |
| ENSG00000211454 | AKR7L       | polymorphic_pseudogene |           | 0.86 | 0.81 | 0.73           | 0.41               | 0.13               |
| ENSG00000244676 | AL109761.5  | processed_transcript   |           | 0.77 | 0.79 | 0.71           | 0.80               | 0.04               |
| ENSG00000225210 | AL589743.1  | lincRNA                |           | 0.84 | 0.79 | 0.84           | 0.23               | 0.20               |
| ENSG00000234380 | AP000330.8  | antisense              |           | 0.83 | 0.91 | 0.89           | 0.97               | -0.01              |
| ENSG00000206195 | AP000525.9  | processed_transcript   |           | 0.84 | 0.79 | 0.85           | 0.15               | 0.24               |
| ENSG00000236663 | AP001631.9  | antisense              |           | 0.71 | 0.81 | 0.86           | 0.85               | 0.03               |
| ENSG00000236830 | CBR3-AS1    | processed_transcript   |           | 0.79 | 0.79 | 0.78           | 0.53               | -0.10              |
| ENSG00000227617 | CERS6-AS1   | antisense              |           | 0.91 | 0.82 | 0.80           | 0.22               | -0.23              |

|                 |                |                        |      |      |      |      |       |
|-----------------|----------------|------------------------|------|------|------|------|-------|
| ENSG00000223392 | CLDN10-AS1     | processed_transcript   | 0.78 | 0.84 | 0.85 | 0.29 | 0.15  |
| ENSG00000260655 | CTA-250D10.23  | lincRNA                | 0.75 | 0.85 | 0.73 | 0.09 | -0.29 |
| ENSG00000205559 | CTA-384D8.20   | antisense              | 0.74 | 0.79 | 0.73 | 0.13 | 0.25  |
| ENSG00000266469 | CTB-131K11.1   | antisense              | 0.78 | 0.79 | 0.74 | 0.25 | 0.20  |
| ENSG00000267696 | CTB-151G24.1   | lincRNA                | 0.82 | 0.83 | 0.77 | 0.49 | -0.11 |
| ENSG00000253686 | CTB-43E15.3    | lincRNA                | 0.89 | 0.80 | 0.73 | 0.10 | 0.26  |
| ENSG00000267512 | CTC-250I14.3   | antisense              | 0.76 | 0.86 | 0.76 | 0.20 | 0.23  |
| ENSG00000253424 | CTC-436K13.3   | lincRNA                | 0.80 | 0.91 | 0.73 | 0.96 | -0.01 |
| ENSG00000267575 | CTC-459F4.3    | processed_transcript   | 0.80 | 0.81 | 0.73 | 0.05 | 0.36  |
| ENSG00000249042 | CTD-2015H6.3   | antisense              | 0.82 | 0.82 | 0.84 | 0.31 | 0.16  |
| ENSG00000261602 | CTD-2033A16.1  | antisense              | 0.85 | 0.83 | 0.84 | 0.02 | 0.39  |
| ENSG00000259802 | CTD-2256P15.2  | antisense              | 0.82 | 0.74 | 0.83 | 0.25 | 0.18  |
| ENSG00000266490 | CTD-2349P21.9  | lincRNA                | 0.88 | 0.76 | 0.74 | 0.19 | -0.21 |
| ENSG00000265415 | CTD-2510F5.4   | antisense              | 0.90 | 0.76 | 0.89 | 0.01 | 0.37  |
| ENSG00000265393 | CTD-2517M22.17 | antisense              | 0.71 | 0.83 | 0.80 | 0.35 | 0.15  |
| ENSG00000260114 | CTD-2574D22.4  | sense_intronic         | 0.97 | 0.89 | 0.78 | 0.83 | 0.04  |
| ENSG00000150316 | CWC15          | processed_transcript   | 0.77 | 0.74 | 0.77 | 0.01 | -0.46 |
| ENSG00000205702 | CYP2D7P1       | polymorphic_pseudogene | 0.73 | 0.73 | 0.71 | 0.04 | -0.33 |
| ENSG00000226950 | DANCR          | processed_transcript   | 0.83 | 0.83 | 0.75 | 0.96 | -0.01 |
| ENSG00000237517 | DGCR5          | antisense              | 0.89 | 0.79 | 0.91 | 0.03 | 0.36  |
| ENSG00000231607 | DLEU2          | processed_transcript   | 0.82 | 0.72 | 0.84 | 0.41 | -0.14 |
| ENSG00000204949 | FAM83A-AS1     | antisense              | 0.91 | 0.93 | 0.95 | 0.01 | 0.45  |
| ENSG00000203499 | FAM83H-AS1     | processed_transcript   | 0.96 | 0.92 | 0.90 | 0.00 | 0.53  |
| ENSG00000230316 | FEZF1-AS1      | antisense              | 0.96 | 0.94 | 0.90 | 0.09 | -0.29 |
| ENSG00000237424 | FOXD2-AS1      | antisense              | 0.95 | 0.93 | 0.90 | 0.80 | -0.04 |
| ENSG00000234741 | GAS5           | processed_transcript   | 0.74 | 0.76 | 0.74 | 0.19 | 0.20  |
| ENSG00000231074 | HCG18          | antisense              | 0.78 | 0.86 | 0.90 | 0.09 | 0.28  |
| ENSG00000228630 | HOTAIR         | antisense              | 0.87 | 0.73 | 0.75 | 0.83 | 0.03  |
| ENSG00000253217 | KB-1991G8.1    | lincRNA                | 0.74 | 0.84 | 0.71 | 0.20 | 0.17  |
| ENSG00000228288 | KDM5B-AS1      | antisense              | 0.99 | 0.93 | 0.93 | 0.44 | 0.13  |
| ENSG00000257702 | LBX2-AS1       | antisense              | 0.84 | 0.86 | 0.83 | 0.41 | -0.13 |
| ENSG00000225880 | LINC00115      | lincRNA                | 0.95 | 0.91 | 0.78 | 0.83 | -0.03 |
| ENSG00000222041 | LINC00152      | lincRNA                | 0.81 | 0.74 | 0.84 | 0.34 | 0.14  |
| ENSG00000153363 | LINC00467      | processed_transcript   | 0.84 | 0.95 | 0.85 | 0.24 | 0.19  |



|                 |                         |                      |      |      |      |      |       |
|-----------------|-------------------------|----------------------|------|------|------|------|-------|
| ENSG00000248360 | LINC00504               | processed_transcript | 0.84 | 0.85 | 0.76 | 0.43 | 0.11  |
| ENSG00000227036 | LINC00511,<br>LINC00673 | processed_transcript | 0.98 | 0.96 | 0.90 | 0.59 | 0.09  |
| ENSG00000223546 | LINC00630               | processed_transcript | 0.79 | 0.83 | 0.79 | 0.77 | 0.05  |
| ENSG00000232677 | LINC00665               | lincRNA              | 0.72 | 0.72 | 0.74 | 0.08 | 0.29  |
| ENSG00000249628 | LINC00942               | lincRNA              | 0.84 | 0.81 | 0.85 | 0.00 | 0.42  |
| ENSG00000244306 | LINC01296               | lincRNA              | 0.86 | 0.81 | 0.86 | 0.29 | 0.18  |
| ENSG00000248538 | LOC101929128            | lincRNA              | 0.76 | 0.78 | 0.87 | 0.02 | 0.36  |
| ENSG00000246582 | LOC389641               | processed_transcript | 0.76 | 0.88 | 0.90 | 0.73 | 0.05  |
| ENSG00000261801 | LOXL1-AS1               | antisense            | 0.75 | 0.75 | 0.80 | 0.47 | 0.12  |
| ENSG00000265688 | MAFG-AS1                | antisense            | 0.76 | 0.76 | 0.81 | 0.12 | 0.24  |
| ENSG00000147676 | MAL2                    | processed_transcript | 0.82 | 0.78 | 0.80 | 0.69 | -0.07 |
| ENSG00000267278 | MAP3K14-AS1             | antisense            | 0.78 | 0.84 | 0.84 | 0.01 | 0.40  |
| ENSG00000215424 | MCM3AP-AS1              | antisense            | 0.82 | 0.86 | 0.71 | 0.19 | 0.21  |
| ENSG00000247095 | MIR210HG                | processed_transcript | 0.84 | 0.83 | 0.74 | 0.41 | 0.13  |
| ENSG00000110347 | MMP12                   | processed_transcript | 0.95 | 0.93 | 0.90 | 0.33 | -0.17 |
| ENSG00000178814 | OPLAH                   | processed_transcript | 0.80 | 0.78 | 0.82 | 0.17 | 0.24  |
| ENSG00000004142 | POLDIP2                 | processed_transcript | 0.73 | 0.81 | 0.91 | 0.00 | 0.52  |
| ENSG00000146143 | PRIM2                   | processed_transcript | 0.97 | 0.87 | 0.88 | 0.59 | -0.09 |
| ENSG00000230082 | PRRT3-AS1               | antisense            | 0.78 | 0.78 | 0.82 | 0.16 | 0.19  |
| ENSG00000249859 | PVT1                    | processed_transcript | 0.99 | 0.95 | 0.93 | 0.41 | 0.14  |
| ENSG00000253722 | RBM12B-AS2              | antisense            | 0.93 | 0.88 | 0.79 | 0.96 | -0.01 |
| ENSG00000160957 | RECQL4                  | processed_transcript | 0.96 | 0.95 | 0.95 | 0.23 | 0.19  |
| ENSG00000233728 | RP11-109P14.9           | antisense            | 0.79 | 0.89 | 0.90 | 0.50 | -0.12 |
| ENSG00000228801 | RP11-110G21.1           | antisense            | 0.73 | 0.83 | 0.73 | 0.14 | 0.25  |
| ENSG00000246089 | RP11-115C21.2           | processed_transcript | 0.71 | 0.71 | 0.82 | 0.86 | 0.03  |
| ENSG00000232445 | RP11-132A1.4            | antisense            | 0.88 | 0.74 | 0.82 | 0.27 | 0.17  |
| ENSG00000264558 | RP11-138C9.1            | antisense            | 0.77 | 0.92 | 0.83 | 0.06 | 0.29  |
| ENSG00000251003 | RP11-152P17.2           | processed_transcript | 0.91 | 0.84 | 0.85 | 0.18 | 0.22  |
| ENSG00000258232 | RP11-161H23.5           | antisense            | 0.74 | 0.85 | 0.84 | 0.03 | 0.39  |
| ENSG00000259772 | RP11-16E12.2            | processed_transcript | 0.85 | 0.88 | 0.81 | 0.82 | -0.04 |
| ENSG00000244202 | RP11-18A3.4             | processed_transcript | 0.75 | 0.91 | 0.73 | 0.82 | 0.04  |
| ENSG00000261716 | RP11-<br>196G18.22      | sense_overlapping    | 0.98 | 0.94 | 0.84 | 0.04 | 0.33  |
| ENSG00000254560 | RP11-1L12.3             | antisense            | 0.90 | 0.81 | 0.90 | 0.84 | 0.03  |
| ENSG00000261140 | RP11-20I23.6            | antisense            | 0.77 | 0.71 | 0.70 | 0.01 | 0.49  |
| ENSG00000260877 | RP11-211G23.2           | lincRNA              | 0.74 | 0.72 | 0.75 | 0.80 | -0.04 |
| ENSG00000255100 | RP11-21L23.3            | antisense            | 0.78 | 0.76 | 0.72 | 0.49 | 0.11  |
| ENSG00000231864 | RP11-<br>229P13.23      | antisense            | 0.92 | 0.94 | 0.95 | 0.19 | 0.21  |

|                 |               |                      |      |      |      |      |       |
|-----------------|---------------|----------------------|------|------|------|------|-------|
| ENSG00000260442 | RP11-22P6.3   | antisense            | 0.93 | 0.77 | 0.78 | 0.68 | -0.07 |
| ENSG00000249731 | RP11-259O2.3  | lincRNA              | 0.90 | 0.89 | 0.83 | 0.66 | 0.07  |
| ENSG00000259747 | RP11-275I4.2  | processed_transcript | 0.74 | 0.71 | 0.74 | 0.97 | -0.01 |
| ENSG00000229953 | RP11-284F21.7 | antisense            | 0.74 | 0.74 | 0.85 | 0.05 | 0.31  |
| ENSG00000203999 | RP11-290F20.1 | processed_transcript | 0.79 | 0.88 | 0.92 | 0.29 | 0.16  |
| ENSG00000249096 | RP11-290F5.1  | lincRNA              | 0.81 | 0.83 | 0.76 | 0.15 | -0.24 |
| ENSG00000233461 | RP11-295G20.2 | antisense            | 0.90 | 0.88 | 0.94 | 0.00 | 0.51  |
| ENSG00000224985 | RP11-297K8.2  | antisense            | 0.78 | 0.88 | 0.85 | 0.25 | 0.18  |
| ENSG00000261061 | RP11-303E16.2 | sense_intronic       | 0.89 | 0.74 | 0.80 | 0.91 | 0.02  |
| ENSG00000261123 | RP11-304L19.3 | sense_intronic       | 0.87 | 0.76 | 0.87 | 0.49 | 0.11  |
| ENSG00000241528 | RP1-130H16.16 | processed_transcript | 0.71 | 0.81 | 0.74 | 0.13 | 0.27  |
| ENSG00000262580 | RP11-334C17.5 | processed_transcript | 0.73 | 0.79 | 0.72 | 0.26 | -0.18 |
| ENSG00000245385 | RP11-334E6.10 | antisense            | 0.73 | 0.73 | 0.75 | 0.20 | 0.23  |
| ENSG00000235872 | RP11-335O4.3  | antisense            | 0.79 | 0.79 | 0.71 | 0.23 | 0.19  |
| ENSG00000259380 | RP11-346D14.1 | lincRNA              | 0.84 | 0.87 | 0.78 | 0.72 | 0.05  |
| ENSG00000257742 | RP11-350F4.2  | lincRNA              | 0.90 | 0.81 | 0.81 | 0.87 | -0.03 |
| ENSG00000262772 | RP11-353N14.2 | lincRNA              | 0.96 | 0.96 | 0.96 | 0.44 | -0.13 |
| ENSG00000253174 | RP11-360L9.7  | antisense            | 0.96 | 0.89 | 0.94 | 0.07 | 0.32  |
| ENSG00000261373 | RP11-368I7.2  | antisense            | 0.95 | 0.90 | 0.89 | 0.09 | 0.28  |
| ENSG00000245149 | RP11-383J24.5 | processed_transcript | 0.92 | 0.89 | 0.76 | 0.10 | -0.28 |
| ENSG00000237978 | RP11-385J1.2  | processed_transcript | 0.75 | 0.74 | 0.81 | 0.16 | 0.22  |
| ENSG00000225518 | RP11-396C23.2 | processed_transcript | 0.85 | 0.85 | 0.91 | 0.09 | 0.25  |
| ENSG00000254258 | RP11-398H6.1  | lincRNA              | 0.96 | 0.87 | 0.84 | 0.15 | -0.24 |
| ENSG00000228437 | RP11-400N13.2 | lincRNA              | 0.85 | 0.82 | 0.76 | 0.52 | 0.10  |
| ENSG00000261039 | RP11-417E7.2  | lincRNA              | 0.88 | 0.80 | 0.86 | 0.12 | 0.25  |
| ENSG00000260265 | RP11-44F21.5  | lincRNA              | 0.81 | 0.76 | 0.75 | 0.39 | 0.14  |
| ENSG00000233631 | RP11-457M11.2 | processed_transcript | 0.73 | 0.75 | 0.74 | 0.50 | -0.11 |
| ENSG00000234678 | RP11-465N4.4  | antisense            | 0.84 | 0.88 | 0.83 | 0.56 | 0.10  |
| ENSG00000260261 | RP11-480A16.1 | lincRNA              | 0.99 | 0.93 | 0.80 | 0.26 | 0.20  |
| ENSG00000227619 | RP11-492E3.2  | antisense            | 0.75 | 0.88 | 0.90 | 0.00 | 0.48  |
| ENSG00000263585 | RP11-498C9.13 | antisense            | 0.98 | 0.97 | 0.99 | 0.02 | 0.42  |
| ENSG00000263198 | RP11-517A5.4  | antisense            | 0.78 | 0.79 | 0.74 | 0.86 | -0.03 |
| ENSG00000223478 | RP11-545E17.3 | antisense            | 0.75 | 0.75 | 0.71 | 0.66 | 0.07  |
| ENSG00000235652 | RP11-545I5.3  | antisense            | 0.89 | 0.85 | 0.76 | 0.58 | 0.08  |
| ENSG00000259049 | RP11-589M4.1  | antisense            | 0.79 | 0.82 | 0.93 | 0.02 | 0.44  |
| ENSG00000259345 | RP11-624L4.1  | processed_transcript | 0.75 | 0.77 | 0.78 | 0.46 | -0.12 |
| ENSG00000261762 | RP11-650L12.2 | antisense            | 0.94 | 0.86 | 0.94 | 0.16 | 0.20  |
| ENSG00000254044 | RP11-681L8.1  | processed_transcript | 0.72 | 0.75 | 0.87 | 0.13 | 0.21  |

|                 |               |                      |      |      |      |      |       |
|-----------------|---------------|----------------------|------|------|------|------|-------|
| ENSG00000249395 | RP11-697M17.1 | lincRNA              | 0.84 | 0.74 | 0.86 | 0.02 | 0.32  |
| ENSG00000264019 | RP11-6N17.6   | antisense            | 0.73 | 0.90 | 0.81 | 0.92 | 0.02  |
| ENSG00000249614 | RP11-703G6.1  | lincRNA              | 0.88 | 0.85 | 0.79 | 0.80 | 0.04  |
| ENSG00000261425 | RP11-709B3.2  | lincRNA              | 0.90 | 0.86 | 0.85 | 0.11 | 0.24  |
| ENSG00000255404 | RP11-770G2.5  | antisense            | 0.93 | 0.86 | 0.85 | 0.19 | 0.23  |
| ENSG00000256940 | RP11-783K16.5 | antisense            | 0.97 | 0.92 | 0.96 | 0.00 | 0.50  |
| ENSG00000248774 | RP11-798M19.3 | antisense            | 0.91 | 0.95 | 0.93 | 0.76 | 0.05  |
| ENSG00000254721 | RP11-805J14.5 | antisense            | 0.85 | 0.78 | 0.89 | 0.91 | 0.02  |
| ENSG00000257732 | RP11-818F20.5 | antisense            | 0.83 | 0.81 | 0.80 | 0.27 | 0.16  |
| ENSG00000258757 | RP11-841O20.2 | antisense            | 0.88 | 0.93 | 0.95 | 0.29 | 0.18  |
| ENSG00000224081 | RP11-86H7.1   | lincRNA              | 0.87 | 0.92 | 0.87 | 0.08 | 0.28  |
| ENSG00000259439 | RP11-89K21.1  | antisense            | 0.77 | 0.86 | 0.83 | 0.08 | 0.30  |
| ENSG00000254338 | RP11-909N17.3 | antisense            | 0.79 | 0.72 | 0.73 | 0.26 | -0.21 |
| ENSG00000253103 | RP11-946L20.4 | lincRNA              | 0.78 | 0.87 | 0.75 | 0.69 | 0.06  |
| ENSG00000262468 | RP11-95P2.1   | lincRNA              | 0.92 | 0.89 | 0.81 | 0.62 | -0.08 |
| ENSG00000257596 | RP11-968A15.2 | antisense            | 0.83 | 0.87 | 0.77 | 0.78 | -0.05 |
| ENSG00000203288 | RP11-98D18.9  | antisense            | 0.86 | 0.91 | 0.92 | 0.47 | 0.12  |
| ENSG00000260920 | RP1-228H13.5  | sense_overlapping    | 0.96 | 0.95 | 0.95 | 0.60 | 0.09  |
| ENSG00000227066 | RP3-340N1.2   | lincRNA              | 0.73 | 0.87 | 0.90 | 0.13 | -0.28 |
| ENSG00000228274 | RP3-508I15.9  | antisense            | 0.89 | 0.82 | 0.77 | 0.44 | 0.13  |
| ENSG00000261189 | RP3-512B11.3  | antisense            | 0.91 | 0.73 | 0.81 | 0.24 | 0.17  |
| ENSG00000196756 | RP4-564F22.2  | processed_transcript | 0.78 | 0.75 | 0.75 | 0.48 | -0.12 |
| ENSG00000213742 | RP4-694B14.5  | antisense            | 0.76 | 0.75 | 0.71 | 0.58 | 0.09  |
| ENSG00000230798 | RP4-792G4.2   | antisense            | 0.91 | 0.84 | 0.92 | 0.72 | -0.06 |
| ENSG00000177788 | RP5-1061H20.4 | processed_transcript | 0.76 | 0.87 | 0.94 | 0.06 | 0.31  |
| ENSG00000237686 | RP5-1120P11.1 | processed_transcript | 0.78 | 0.77 | 0.84 | 0.48 | 0.11  |
| ENSG00000243479 | RP5-1121A15.1 | antisense            | 0.88 | 0.94 | 0.93 | 0.27 | 0.18  |
| ENSG00000228265 | RP5-1125A11.1 | lincRNA              | 0.90 | 0.91 | 0.91 | 0.79 | -0.04 |
| ENSG00000224407 | RP5-956O18.3  | antisense            | 0.71 | 0.76 | 0.83 | 0.04 | 0.41  |
| ENSG00000259153 | RP6-65G23.3   | lincRNA              | 0.91 | 0.93 | 0.94 | 0.51 | 0.10  |
| ENSG00000229952 | RP6-74O6.3    | lincRNA              | 0.88 | 0.84 | 0.76 | 0.13 | -0.30 |
| ENSG00000206573 | SETD5-AS1     | antisense            | 0.83 | 0.88 | 0.71 | 0.25 | -0.19 |
| ENSG00000137700 | SLC37A4       | processed_transcript | 0.75 | 0.94 | 0.90 | 0.75 | -0.05 |
| ENSG00000213599 | SLX1A-SULT1A3 | processed_transcript | 0.94 | 0.72 | 0.73 | 0.96 | 0.01  |
| ENSG00000255717 | SNHG1         | processed_transcript | 0.91 | 0.88 | 0.85 | 0.87 | 0.03  |
| ENSG00000242125 | SNHG3         | processed_transcript | 0.75 | 0.91 | 0.78 | 0.70 | -0.07 |
| ENSG00000251022 | THAP9-AS1     | processed_transcript | 0.81 | 0.74 | 0.73 | 0.51 | -0.11 |

|                 |               |                      |      |      |      |      |       |
|-----------------|---------------|----------------------|------|------|------|------|-------|
| ENSG00000214049 | UCA1          | lincRNA              | 0.77 | 0.85 | 0.72 | 0.07 | 0.28  |
| ENSG00000249348 | UGDH-AS1      | antisense            | 0.81 | 0.87 | 0.75 | 0.82 | 0.03  |
| ENSG00000034063 | UHRF1         | processed_transcript | 0.96 | 0.96 | 0.97 | 0.15 | 0.24  |
| ENSG00000223561 | AC003090.1    | processed_transcript | 0.16 | 0.17 | 0.21 | 0.12 | -0.38 |
| ENSG00000214870 | AC004540.5    | processed_transcript | 0.10 | 0.17 | 0.22 | 0.18 | 0.22  |
| ENSG00000267688 | AC005262.2    | antisense            | 0.25 | 0.20 | 0.20 | 0.02 | 0.43  |
| ENSG00000239467 | AC007405.6    | lincRNA              | 0.16 | 0.24 | 0.18 | 0.91 | -0.02 |
| ENSG00000235584 | AC008268.1    | lincRNA              | 0.04 | 0.19 | 0.15 | 0.12 | -0.37 |
| ENSG00000232220 | AC008440.5    | antisense            | 0.04 | 0.09 | 0.10 | 0.10 | 0.30  |
| ENSG00000249249 | AC010226.4    | antisense            | 0.03 | 0.10 | 0.16 | 0.13 | -0.27 |
| ENSG00000267107 | AC011526.1    | lincRNA              | 0.01 | 0.07 | 0.05 | 0.75 | 0.05  |
| ENSG00000233038 | AC011899.9    | antisense            | 0.02 | 0.10 | 0.08 | 0.16 | -0.24 |
| ENSG00000238018 | AC093110.3    | antisense            | 0.07 | 0.08 | 0.07 | 0.71 | 0.06  |
| ENSG00000233766 | AC098617.1    | antisense            | 0.00 | 0.07 | 0.04 | 0.77 | 0.05  |
| ENSG00000235997 | AC109642.1    | lincRNA              | 0.01 | 0.11 | 0.11 | 0.76 | -0.05 |
| ENSG00000260833 | AC124789.1    | processed_transcript | 0.19 | 0.10 | 0.06 | 0.22 | 0.19  |
| ENSG00000263065 | AF001548.6    | antisense            | 0.06 | 0.22 | 0.15 | 0.39 | 0.14  |
| ENSG00000151303 | AGAP11        | processed_transcript | 0.01 | 0.03 | 0.03 | 0.10 | -0.28 |
| ENSG00000248445 | CTB-118N6.3   | antisense            | 0.18 | 0.22 | 0.16 | 0.71 | -0.07 |
| ENSG00000267598 | CTC-250I14.6  | antisense            | 0.10 | 0.14 | 0.22 | 0.37 | 0.16  |
| ENSG00000267427 | CTC-503J8.6   | lincRNA              | 0.17 | 0.24 | 0.23 | 0.38 | -0.13 |
| ENSG00000259945 | CTD-2012K14.3 | antisense            | 0.10 | 0.14 | 0.11 | 0.31 | -0.16 |
| ENSG00000259603 | CTD-2012M11.3 | antisense            | 0.12 | 0.19 | 0.13 | 0.17 | -0.28 |
| ENSG00000260892 | CTD-2026K11.1 | antisense            | 0.11 | 0.21 | 0.25 | 0.07 | 0.29  |
| ENSG00000248896 | CTD-2135J3.3  | processed_transcript | 0.12 | 0.19 | 0.19 | 0.44 | -0.14 |
| ENSG00000259285 | CTD-2330J20.2 | antisense            | 0.12 | 0.15 | 0.20 | 0.10 | -0.38 |
| ENSG00000254429 | CTD-2562J17.7 | antisense            | 0.09 | 0.11 | 0.12 | 0.28 | -0.19 |
| ENSG00000254963 | CTD-2562J17.9 | antisense            | 0.08 | 0.24 | 0.16 | 0.66 | -0.07 |
| ENSG00000254109 | CTD-3107M8.4  | antisense            | 0.09 | 0.22 | 0.16 | 0.96 | -0.01 |
| ENSG00000258498 | DIO3OS        | lincRNA              | 0.05 | 0.23 | 0.16 | 0.92 | 0.02  |
| ENSG00000225733 | FGD5-AS1      | antisense            | 0.20 | 0.15 | 0.21 | 0.31 | 0.18  |
| ENSG00000237786 | GFOD1-AS1     | antisense            | 0.22 | 0.20 | 0.12 | 0.93 | 0.02  |
| ENSG00000235385 | GS1-600G8.5   | lincRNA              | 0.06 | 0.11 | 0.05 | 0.34 | -0.17 |
| ENSG00000248890 | HHIP-AS1      | processed_transcript | 0.05 | 0.14 | 0.15 | 0.79 | -0.04 |
| ENSG00000230530 | LIMD1-AS1     | processed_transcript | 0.12 | 0.18 | 0.11 | 0.55 | -0.10 |
| ENSG00000196972 | LINC00087     | lincRNA              | 0.17 | 0.21 | 0.17 | 0.20 | 0.21  |
| ENSG00000229645 | LINC00341     | lincRNA              | 0.01 | 0.07 | 0.05 | 0.02 | -0.44 |

|                 |               |                      |      |      |      |      |       |
|-----------------|---------------|----------------------|------|------|------|------|-------|
| ENSG00000234456 | MAGI2-AS3     | processed_transcript | 0.04 | 0.15 | 0.08 | 0.51 | 0.11  |
| ENSG00000249669 | MIR143HG      | processed_transcript | 0.14 | 0.23 | 0.20 | 0.93 | -0.02 |
| ENSG00000186594 | MIR22HG       | lincRNA              | 0.00 | 0.06 | 0.04 | 0.80 | -0.04 |
| ENSG00000267532 | MIR497HG      | antisense            | 0.02 | 0.10 | 0.10 | 0.37 | -0.16 |
| ENSG00000247809 | NR2F2-AS1     | antisense            | 0.04 | 0.12 | 0.12 | 0.23 | 0.18  |
| ENSG00000224597 | PTCHD3P1      | antisense            | 0.09 | 0.13 | 0.17 | 0.09 | 0.24  |
| ENSG00000243352 | RN7SL8P       | misc_RNA             | 0.07 | 0.20 | 0.10 | 0.06 | -0.36 |
| ENSG00000259884 | RP11-1100L3.8 | lincRNA              | 0.03 | 0.14 | 0.17 | 0.22 | 0.20  |
| ENSG00000246430 | RP11-16M8.2   | lincRNA              | 0.00 | 0.05 | 0.06 | 0.97 | 0.01  |
| ENSG00000257524 | RP11-203J24.9 | processed_transcript | 0.09 | 0.23 | 0.22 | 0.13 | -0.23 |
| ENSG00000177406 | RP11-218M22.1 | antisense            | 0.12 | 0.23 | 0.21 | 0.70 | -0.07 |
| ENSG00000225032 | RP11-228B15.4 | antisense            | 0.07 | 0.16 | 0.10 | 0.20 | -0.24 |
| ENSG00000233895 | RP1-122P22.2  | lincRNA              | 0.24 | 0.22 | 0.22 | 0.49 | 0.10  |
| ENSG00000253821 | RP11-246K15.1 | lincRNA              | 0.06 | 0.16 | 0.16 |      |       |
| ENSG00000228401 | RP11-251M1.1  | antisense            | 0.03 | 0.11 | 0.07 | 0.39 | -0.15 |
| ENSG00000258844 | RP11-259K15.2 | lincRNA              | 0.04 | 0.23 | 0.20 | 0.08 | -0.37 |
| ENSG00000256013 | RP11-27M24.1  | antisense            | 0.00 | 0.06 | 0.02 | 0.14 | 0.26  |
| ENSG00000234531 | RP11-288G11.3 | lincRNA              | 0.22 | 0.15 | 0.13 | 0.60 | 0.08  |
| ENSG00000224397 | RP11-290F20.3 | lincRNA              | 0.01 | 0.15 | 0.06 | 0.28 | 0.19  |
| ENSG00000267774 | RP11-2N1.2    | antisense            | 0.01 | 0.04 | 0.10 | 0.13 | 0.29  |
| ENSG00000258647 | RP11-304N14.2 | lincRNA              | 0.15 | 0.22 | 0.16 | 0.02 | -0.54 |
| ENSG00000225329 | RP11-325F22.5 | lincRNA              | 0.04 | 0.19 | 0.12 | 0.08 | -0.34 |
| ENSG00000235387 | RP11-327L3.1  | processed_transcript | 0.04 | 0.08 | 0.07 | 0.27 | -0.28 |
| ENSG00000267280 | RP11-332H18.4 | antisense            | 0.03 | 0.09 | 0.07 | 0.48 | -0.11 |
| ENSG00000227010 | RP11-336K24.6 | processed_transcript | 0.10 | 0.21 | 0.11 | 0.30 | -0.19 |
| ENSG00000257474 | RP11-359M6.1  | lincRNA              | 0.11 | 0.17 | 0.22 | 0.64 | -0.08 |
| ENSG00000239268 | RP11-384F7.2  | processed_transcript | 0.02 | 0.04 | 0.06 | 0.27 | -0.30 |
| ENSG00000231187 | RP11-38L15.3  | antisense            | 0.15 | 0.18 | 0.09 | 0.37 | -0.15 |
| ENSG00000261685 | RP11-401P9.4  | lincRNA              | 0.03 | 0.09 | 0.07 | 0.66 | -0.09 |
| ENSG00000242569 | RP11-435B5.3  | lincRNA              | 0.11 | 0.18 | 0.14 | 0.79 | -0.05 |
| ENSG00000259007 | RP11-463J10.3 | antisense            | 0.03 | 0.18 | 0.21 | 0.36 | -0.14 |
| ENSG00000262370 | RP11-473M20.9 | lincRNA              | 0.03 | 0.24 | 0.09 | 0.01 | -0.40 |
| ENSG00000260879 | RP11-483I13.5 | antisense            | 0.17 | 0.20 | 0.21 | 0.53 | 0.10  |
| ENSG00000204054 | RP11-492E3.1  | lincRNA              | 0.09 | 0.24 | 0.21 | 0.33 | 0.17  |
| ENSG00000261452 | RP11-509E16.1 | lincRNA              | 0.11 | 0.17 | 0.19 | 0.30 | -0.18 |
| ENSG00000260461 | RP11-541N10.3 | sense_overlapping    | 0.06 | 0.15 | 0.09 | 0.66 | -0.08 |
| ENSG00000260804 | RP11-566E18.3 | lincRNA              | 0.08 | 0.11 | 0.11 | 0.13 | -0.26 |

|                 |                |                        |      |      |      |      |       |
|-----------------|----------------|------------------------|------|------|------|------|-------|
| ENSG00000263707 | RP11-597M12.1  | antisense              | 0.08 | 0.09 | 0.08 | 0.07 | -0.32 |
| ENSG00000256948 | RP11-598F7.3   | antisense              | 0.04 | 0.12 | 0.04 | 0.01 | -0.46 |
| ENSG00000255191 | RP11-626H12.1  | lincRNA                | 0.08 | 0.14 | 0.17 | 0.70 | 0.06  |
| ENSG00000266283 | RP11-627G18.1  | antisense              | 0.05 | 0.11 | 0.09 | 0.69 | 0.06  |
| ENSG00000266010 | RP11-627G18.3  | lincRNA                | 0.12 | 0.23 | 0.09 | 0.20 | -0.23 |
| ENSG00000242396 | RP11-67L3.5    | antisense              | 0.15 | 0.24 | 0.17 | 0.23 | 0.20  |
| ENSG00000264299 | RP11-680F20.12 | antisense              | 0.18 | 0.14 | 0.18 | 0.04 | -0.34 |
| ENSG00000227220 | RP11-69I8.3    | antisense              | 0.07 | 0.16 | 0.20 | 0.19 | 0.22  |
| ENSG00000261054 | RP11-6O2.4     | antisense              | 0.03 | 0.13 | 0.10 | 0.42 | 0.14  |
| ENSG00000251230 | RP11-701P16.5  | processed_transcript   | 0.02 | 0.09 | 0.03 | 0.44 | -0.13 |
| ENSG00000255390 | RP11-732A19.5  | antisense              | 0.09 | 0.19 | 0.21 | 0.57 | 0.09  |
| ENSG00000255471 | RP11-736K20.5  | antisense              | 0.14 | 0.14 | 0.18 | 0.01 | 0.42  |
| ENSG00000255197 | RP11-750H9.5   | antisense              | 0.03 | 0.16 | 0.12 | 0.68 | -0.06 |
| ENSG00000259094 | RP11-77A13.1   | antisense              | 0.07 | 0.16 | 0.16 | 0.58 | -0.10 |
| ENSG00000225278 | RP11-782C8.5   | processed_transcript   | 0.10 | 0.21 | 0.17 | 0.94 | -0.01 |
| ENSG00000267396 | RP11-845C23.3  | antisense              | 0.06 | 0.10 | 0.09 | 0.23 | -0.21 |
| ENSG00000256469 | RP11-856F16.2  | antisense              | 0.04 | 0.12 | 0.07 | 0.90 | 0.02  |
| ENSG00000245025 | RP11-875O11.1  | processed_transcript   | 0.10 | 0.22 | 0.23 | 0.09 | -0.31 |
| ENSG00000257894 | RP1-78O14.1    | lincRNA                | 0.03 | 0.07 | 0.11 | 0.71 | -0.06 |
| ENSG00000235501 | RP4-639F20.1   | antisense              | 0.14 | 0.16 | 0.14 | 0.66 | -0.08 |
| ENSG00000258545 | RP4-755D9.1    | processed_transcript   | 0.12 | 0.23 | 0.15 | 0.89 | -0.02 |
| ENSG00000267272 | RP5-1052I5.1   | lincRNA                | 0.09 | 0.10 | 0.13 | 0.15 | -0.23 |
| ENSG00000259716 | RP5-977B1.11   | antisense              | 0.07 | 0.12 | 0.07 | 0.32 | 0.17  |
| ENSG00000012171 | SEMA3B         | processed_transcript   | 0.09 | 0.07 | 0.11 | 0.37 | 0.15  |
| ENSG00000225383 | SFTA1P         | lincRNA                | 0.07 | 0.13 | 0.14 | 0.01 | -0.43 |
| ENSG00000255399 | TBX5-AS1       | antisense              | 0.01 | 0.07 | 0.11 | 0.84 | 0.03  |
| ENSG00000197253 | TPSB2          | polymorphic_pseudogene | 0.04 | 0.14 | 0.15 | 0.27 | -0.17 |
| ENSG00000232352 | U73167.7       | antisense              | 0.11 | 0.21 | 0.14 | 0.23 | 0.19  |

**Supplementary Table S3: *LINC00857* expression and clinical variables from validation set of 101 ADs measured by qRT-PCR**

| Variables       | Validation set | Linc00857 | <i>P</i> value* |
|-----------------|----------------|-----------|-----------------|
| Age             |                |           |                 |
| <= 65           | 42             | 5.8       |                 |
| > 65            | 59             | 4.5       | 0.2             |
| Gender          |                |           |                 |
| Female          | 53 (52.5%)     | 5.4       |                 |
| Male            | 48             | 4.7       | 0.5             |
| Stage           |                |           |                 |
| Stage I         | 59 (58.4%)     | 4.6       |                 |
| Stage II        | 16             | 4.6       | 0.2             |
| Stage III       | 26             | 6.4       | 0.2             |
| N status        |                |           |                 |
| No              |                | 4.6       |                 |
| N1-2            |                | 6.1       | 0.3             |
| Differentiation |                |           |                 |
| Well            | 28             | 3.3       |                 |
| Moderate        | 38             | 6.7       | 0.005           |
| Poor            | 34 (33.7%)     | 4.6       | 0.1             |

\**t* test was used.

**Supplementary Table S4: Genes regulated by *LINC00857* siRNA knock down**

| ProbeID  | Symbol       | H1299<br>NT | H1299<br>LINC00857<br>siRNA | H838 NT | H838<br>LINC00857<br>siRNA | H1299<br>LINC00857<br>siRNA/NT | H838<br>LINC00857<br>siRNA/NT |
|----------|--------------|-------------|-----------------------------|---------|----------------------------|--------------------------------|-------------------------------|
| 16706610 | LINC00857    | 6.03        | 3.97                        | 6.16    | 4.68                       | 0.240                          | 0.359                         |
| 17125850 |              | 4.43        | 1.60                        | 4.03    | 3.26                       | 0.141                          | 0.586                         |
| 17025664 | MIR1913      | 3.88        | 1.14                        | 2.37    | 1.32                       | 0.150                          | 0.481                         |
| 16813999 |              | 3.36        | 0.71                        | 2.09    | 1.32                       | 0.159                          | 0.588                         |
| 17089363 |              | 3.74        | 1.37                        | 2.87    | 1.16                       | 0.193                          | 0.305                         |
| 16915113 |              | 3.06        | 0.79                        | 2.55    | 1.58                       | 0.208                          | 0.511                         |
| 16847414 |              | 3.02        | 1.08                        | 1.82    | 0.84                       | 0.260                          | 0.504                         |
| 17024315 |              | 3.81        | 1.90                        | 1.49    | 0.44                       | 0.265                          | 0.485                         |
| 16979944 |              | 5.16        | 3.30                        | 2.66    | 1.64                       | 0.276                          | 0.496                         |
| 17118066 | LOC728093    | 3.43        | 1.63                        | 3.80    | 2.88                       | 0.288                          | 0.530                         |
| 17118127 | LOC728093    | 3.43        | 1.63                        | 3.80    | 2.88                       | 0.288                          | 0.530                         |
| 17118104 | LOC728093    | 3.43        | 1.63                        | 3.80    | 2.88                       | 0.288                          | 0.530                         |
| 17118058 | LOC728093    | 3.43        | 1.63                        | 3.80    | 2.88                       | 0.288                          | 0.530                         |
| 16771030 |              | 2.16        | 0.36                        | 1.83    | 0.64                       | 0.289                          | 0.437                         |
| 16934866 | MIR659       | 2.81        | 1.16                        | 2.83    | 1.07                       | 0.319                          | 0.295                         |
| 16902923 | MIR663B      | 3.17        | 1.64                        | 3.03    | 1.91                       | 0.348                          | 0.458                         |
| 17005611 | BTN3A2       | 2.20        | 0.70                        | 1.76    | 0.98                       | 0.352                          | 0.584                         |
| 16766940 |              | 4.58        | 3.09                        | 6.06    | 4.57                       | 0.356                          | 0.356                         |
| 16975928 | USP46        | 5.26        | 3.78                        | 5.55    | 4.45                       | 0.359                          | 0.469                         |
| 16934552 |              | 2.07        | 0.59                        | 1.69    | 0.75                       | 0.359                          | 0.518                         |
| 17061757 |              | 3.85        | 2.38                        | 3.45    | 1.64                       | 0.361                          | 0.284                         |
| 17078914 |              | 4.83        | 3.36                        | 5.56    | 4.74                       | 0.361                          | 0.566                         |
| 16907324 | MPP4         | 4.73        | 3.29                        | 3.86    | 2.91                       | 0.368                          | 0.518                         |
| 16824123 |              | 4.82        | 3.39                        | 4.76    | 3.78                       | 0.373                          | 0.508                         |
| 16818473 |              | 2.32        | 0.90                        | 2.15    | 1.20                       | 0.373                          | 0.517                         |
| 17118399 |              | 2.24        | 0.83                        | 1.81    | 0.81                       | 0.374                          | 0.499                         |
| 16773224 | CIQTNF9      | 2.05        | 0.65                        | 1.66    | 0.74                       | 0.378                          | 0.530                         |
| 16850090 | DUS1L        | 6.38        | 5.02                        | 5.55    | 4.12                       | 0.390                          | 0.370                         |
| 16698120 |              | 4.27        | 2.93                        | 4.71    | 3.65                       | 0.396                          | 0.479                         |
| 16869058 |              | 4.36        | 3.03                        | 3.18    | 0.90                       | 0.398                          | 0.207                         |
| 16799492 | LOC100505573 | 5.66        | 4.33                        | 3.71    | 1.64                       | 0.399                          | 0.238                         |
| 16824572 | GPRC5B       | 2.26        | 0.95                        | 3.92    | 2.69                       | 0.403                          | 0.425                         |
| 17123882 |              | 6.52        | 5.22                        | 6.26    | 5.50                       | 0.405                          | 0.592                         |
| 16701911 |              | 2.00        | 0.72                        | 2.55    | 1.13                       | 0.411                          | 0.372                         |
| 16968378 | ENOPH1       | 7.77        | 6.49                        | 7.18    | 6.20                       | 0.411                          | 0.508                         |
| 16869487 |              | 5.09        | 3.81                        | 5.12    | 4.11                       | 0.413                          | 0.494                         |
| 16945868 |              | 2.27        | 1.00                        | 1.96    | 0.92                       | 0.415                          | 0.489                         |



|          |           |      |      |      |      |       |       |
|----------|-----------|------|------|------|------|-------|-------|
| 16957565 |           | 3.07 | 1.81 | 5.40 | 3.71 | 0.415 | 0.309 |
| 17108827 | PRKX      | 6.92 | 5.65 | 5.50 | 4.11 | 0.416 | 0.381 |
| 16969700 | GAR1      | 5.44 | 4.18 | 5.16 | 3.93 | 0.416 | 0.426 |
| 16944931 | FAM86JP   | 3.09 | 1.83 | 3.34 | 2.57 | 0.417 | 0.588 |
| 16860418 | CCNE1     | 6.76 | 5.51 | 6.79 | 5.75 | 0.421 | 0.484 |
| 17085073 |           | 2.23 | 0.99 | 3.73 | 1.42 | 0.422 | 0.201 |
| 17009902 |           | 3.33 | 2.10 | 1.72 | 0.87 | 0.424 | 0.557 |
| 16793721 | PPP2R5E   | 7.96 | 6.78 | 7.71 | 6.79 | 0.441 | 0.529 |
| 17067755 | MAK16     | 7.81 | 6.63 | 7.71 | 6.88 | 0.442 | 0.560 |
| 17016486 | HIST1H2BL | 5.27 | 4.10 | 4.00 | 2.75 | 0.444 | 0.423 |
| 16678907 | COA6      | 5.22 | 4.06 | 4.84 | 3.95 | 0.448 | 0.540 |
| 17119158 |           | 2.40 | 1.25 | 2.55 | 1.25 | 0.449 | 0.407 |
| 17100862 |           | 3.61 | 2.46 | 3.32 | 2.39 | 0.451 | 0.528 |
| 16800678 |           | 3.03 | 1.89 | 4.13 | 3.01 | 0.452 | 0.461 |
| 17003208 | LMAN2     | 9.35 | 8.21 | 8.55 | 7.63 | 0.453 | 0.530 |
| 16851697 |           | 1.93 | 0.79 | 1.57 | 0.80 | 0.453 | 0.587 |
| 16684089 | RPA2      | 6.65 | 5.52 | 6.48 | 5.55 | 0.457 | 0.524 |
| 16743721 | MMP1      | 2.45 | 1.33 | 2.00 | 1.05 | 0.462 | 0.520 |
| 16808386 | MFAP1     | 8.64 | 7.52 | 8.75 | 7.94 | 0.462 | 0.568 |
| 16771303 | TRIAP1    | 5.50 | 4.39 | 4.74 | 3.95 | 0.463 | 0.579 |
| 16855578 | LMAN1     | 9.84 | 8.73 | 9.81 | 8.71 | 0.463 | 0.469 |
| 17065851 | FAM66D    | 3.58 | 2.49 | 3.38 | 2.14 | 0.471 | 0.421 |
| 17079436 | HRSP12    | 6.22 | 5.17 | 5.67 | 4.85 | 0.482 | 0.567 |
| 16855684 | KDSR      | 7.92 | 6.87 | 7.04 | 6.02 | 0.483 | 0.494 |
| 16732043 | MIR4492   | 3.47 | 2.42 | 5.01 | 3.96 | 0.483 | 0.482 |
| 16840284 | C1QBP     | 9.74 | 8.70 | 9.58 | 8.68 | 0.485 | 0.537 |
| 16826435 |           | 3.82 | 2.78 | 3.07 | 2.27 | 0.486 | 0.576 |
| 17051497 |           | 3.28 | 2.26 | 4.35 | 2.40 | 0.492 | 0.259 |
| 17118022 |           | 4.65 | 3.65 | 5.19 | 4.25 | 0.500 | 0.520 |
| 16994942 |           | 1.87 | 0.87 | 2.11 | 0.70 | 0.501 | 0.377 |
| 16755221 | LOC144486 | 3.31 | 2.31 | 3.85 | 2.57 | 0.501 | 0.413 |
| 16666545 | LPHN2     | 5.59 | 4.60 | 5.88 | 4.54 | 0.503 | 0.394 |
| 17047382 | TRIM73    | 3.40 | 2.42 | 2.27 | 1.06 | 0.506 | 0.434 |
| 16960618 | TMEM14E   | 1.98 | 0.99 | 2.64 | 1.64 | 0.506 | 0.503 |
| 16989259 |           | 2.58 | 1.60 | 2.66 | 0.97 | 0.507 | 0.311 |
| 17092118 |           | 2.09 | 1.12 | 1.86 | 0.94 | 0.510 | 0.526 |
| 17005535 | HIST1H4A  | 2.72 | 1.75 | 3.65 | 2.88 | 0.513 | 0.589 |
| 16836824 | MRC2      | 3.14 | 2.18 | 3.52 | 2.49 | 0.514 | 0.490 |
| 16769838 | MIR619    | 2.75 | 1.79 | 2.51 | 1.39 | 0.514 | 0.461 |

|          |              |      |      |      |      |       |       |
|----------|--------------|------|------|------|------|-------|-------|
| 16837187 |              | 2.13 | 1.19 | 1.91 | 1.06 | 0.523 | 0.555 |
| 17048072 | STEAP1       | 5.83 | 4.90 | 3.07 | 0.99 | 0.525 | 0.236 |
| 17089982 | DOLPP1       | 7.20 | 6.27 | 6.69 | 5.78 | 0.527 | 0.534 |
| 17043365 |              | 4.75 | 3.83 | 5.03 | 4.24 | 0.527 | 0.578 |
| 16846283 | HOXB8        | 2.38 | 1.46 | 2.59 | 1.48 | 0.527 | 0.465 |
| 16979845 |              | 3.38 | 2.46 | 3.22 | 1.83 | 0.528 | 0.382 |
| 16968428 |              | 5.89 | 4.98 | 4.56 | 3.69 | 0.530 | 0.549 |
| 16661459 | STX12        | 6.25 | 5.33 | 6.41 | 5.42 | 0.531 | 0.500 |
| 16944432 | MAATS1       | 4.59 | 3.68 | 1.91 | 1.10 | 0.532 | 0.569 |
| 16870733 | ZNF14        | 4.98 | 4.07 | 2.90 | 1.60 | 0.532 | 0.405 |
| 17046737 |              | 4.12 | 3.21 | 2.88 | 1.29 | 0.533 | 0.334 |
| 16914941 | RP4-724E16.2 | 1.82 | 0.92 | 3.68 | 2.20 | 0.536 | 0.357 |
| 17126216 |              | 3.36 | 2.47 | 3.94 | 3.16 | 0.538 | 0.583 |
| 17068061 |              | 3.00 | 2.11 | 3.76 | 2.92 | 0.540 | 0.561 |
| 17124364 |              | 3.82 | 2.94 | 3.55 | 2.60 | 0.543 | 0.519 |
| 16703659 | MAP3K8       | 1.91 | 1.03 | 6.56 | 5.48 | 0.544 | 0.472 |
| 16692620 |              | 3.95 | 3.07 | 3.73 | 2.16 | 0.544 | 0.335 |
| 17079396 |              | 2.15 | 1.27 | 2.12 | 0.78 | 0.545 | 0.395 |
| 16858003 |              | 4.21 | 3.35 | 3.83 | 2.65 | 0.551 | 0.440 |
| 16903929 | FAM133DP     | 4.63 | 3.77 | 4.86 | 3.83 | 0.551 | 0.491 |
| 16900018 |              | 6.93 | 6.07 | 7.36 | 6.53 | 0.552 | 0.560 |
| 16747896 | CLEC4A       | 2.15 | 1.29 | 2.14 | 1.10 | 0.552 | 0.486 |
| 16695388 |              | 2.84 | 2.00 | 4.44 | 1.64 | 0.558 | 0.144 |
| 16937671 | HRH1         | 2.60 | 1.76 | 4.00 | 2.66 | 0.558 | 0.396 |
| 17126104 |              | 3.36 | 2.52 | 3.70 | 2.44 | 0.559 | 0.420 |
| 16869684 | EMR2         | 2.14 | 1.30 | 4.08 | 2.88 | 0.559 | 0.434 |
| 16730522 | BIRC3        | 9.27 | 8.43 | 5.45 | 4.12 | 0.559 | 0.397 |
| 16666416 | NEXN         | 2.82 | 1.99 | 6.06 | 5.31 | 0.564 | 0.594 |
| 16899982 |              | 1.82 | 1.00 | 2.65 | 1.50 | 0.564 | 0.453 |
| 17019134 | USP49        | 3.19 | 2.36 | 2.29 | 1.51 | 0.565 | 0.580 |
| 17119006 |              | 3.76 | 2.93 | 4.19 | 2.73 | 0.565 | 0.365 |
| 16824022 |              | 2.55 | 1.74 | 3.48 | 1.84 | 0.569 | 0.321 |
| 16997010 |              | 1.51 | 0.70 | 2.55 | 1.64 | 0.570 | 0.532 |
| 16669463 |              | 1.73 | 0.93 | 2.69 | 0.99 | 0.571 | 0.308 |
| 17080444 |              | 2.09 | 1.29 | 3.37 | 2.51 | 0.574 | 0.550 |
| 16792194 |              | 1.68 | 0.88 | 1.56 | 0.72 | 0.575 | 0.559 |
| 16896315 |              | 2.26 | 1.47 | 2.74 | 0.89 | 0.575 | 0.279 |
| 16911132 | PRNP         | 7.28 | 6.48 | 8.47 | 7.44 | 0.576 | 0.491 |
| 16669566 |              | 5.35 | 4.56 | 6.74 | 5.96 | 0.576 | 0.582 |

|          |              |      |      |      |      |       |       |
|----------|--------------|------|------|------|------|-------|-------|
| 16670197 |              | 5.35 | 4.56 | 6.74 | 5.96 | 0.576 | 0.582 |
| 16672298 | KIRREL-IT1   | 4.19 | 3.40 | 5.58 | 4.08 | 0.579 | 0.354 |
| 16934749 | RAC2         | 1.91 | 1.13 | 2.35 | 1.52 | 0.581 | 0.560 |
| 17084605 | UNC13B       | 7.11 | 6.33 | 5.91 | 5.08 | 0.581 | 0.561 |
| 17074735 |              | 5.04 | 4.26 | 5.33 | 4.57 | 0.582 | 0.589 |
| 17125782 |              | 2.26 | 1.49 | 3.27 | 2.39 | 0.585 | 0.544 |
| 16679970 | LINC00115    | 1.26 | 0.49 | 1.78 | 0.79 | 0.586 | 0.504 |
| 17108745 | DHRX         | 1.37 | 0.60 | 2.66 | 1.42 | 0.587 | 0.422 |
| 16978502 | SLC9B1       | 1.46 | 0.69 | 1.56 | 0.74 | 0.588 | 0.567 |
| 16817685 | PAGR1        | 5.07 | 4.30 | 5.53 | 4.68 | 0.589 | 0.556 |
| 16761549 | PRB1         | 2.20 | 1.43 | 3.45 | 1.70 | 0.589 | 0.298 |
| 16948236 | ZNF639       | 5.33 | 4.57 | 5.72 | 4.73 | 0.590 | 0.503 |
| 16670291 |              | 2.62 | 1.86 | 2.78 | 1.76 | 0.592 | 0.496 |
| 16749103 |              | 3.95 | 3.19 | 4.56 | 3.59 | 0.592 | 0.513 |
| 17016025 |              | 2.18 | 1.43 | 2.56 | 0.71 | 0.593 | 0.277 |
| 17035334 |              | 2.53 | 1.78 | 3.24 | 2.21 | 0.593 | 0.490 |
| 16833295 |              | 1.66 | 0.91 | 1.92 | 0.82 | 0.594 | 0.469 |
| 16995534 | MIR3650      | 2.36 | 1.61 | 3.21 | 2.02 | 0.595 | 0.436 |
| 16676515 |              | 3.85 | 3.10 | 3.77 | 2.45 | 0.598 | 0.400 |
| 17119204 |              | 1.26 | 0.52 | 2.23 | 1.42 | 0.599 | 0.569 |
| 17106179 | ACSL4        | 2.62 | 1.88 | 3.02 | 1.92 | 0.600 | 0.466 |
| 16701630 | OR2T35       | 0.63 | 1.40 | 0.56 | 1.63 | 1.700 | 2.106 |
| 16775162 | DIAPH3-AS2   | 0.56 | 1.34 | 0.69 | 2.12 | 1.718 | 2.710 |
| 16704298 |              | 0.94 | 1.73 | 1.30 | 4.09 | 1.722 | 6.906 |
| 16889633 |              | 1.53 | 2.32 | 2.36 | 3.68 | 1.728 | 2.492 |
| 16885221 |              | 1.99 | 2.78 | 3.03 | 4.04 | 1.733 | 2.013 |
| 16926027 |              | 2.90 | 3.69 | 3.40 | 4.36 | 1.735 | 1.945 |
| 16901533 |              | 7.22 | 8.01 | 2.13 | 3.31 | 1.736 | 2.264 |
| 16971251 |              | 1.85 | 2.65 | 1.66 | 3.74 | 1.744 | 4.234 |
| 17065905 | MIR3926-2    | 1.29 | 2.10 | 1.29 | 2.23 | 1.746 | 1.922 |
| 17079348 | LOC100500773 | 4.73 | 5.53 | 5.07 | 5.94 | 1.747 | 1.833 |
| 16758128 |              | 0.44 | 1.25 | 0.86 | 1.80 | 1.753 | 1.911 |
| 17117480 | LOC100507663 | 3.08 | 3.91 | 4.43 | 5.37 | 1.775 | 1.919 |
| 16930182 | APOBEC3F     | 2.11 | 2.94 | 1.38 | 2.92 | 1.782 | 2.913 |
| 16983742 |              | 1.68 | 2.51 | 1.92 | 3.49 | 1.783 | 2.961 |
| 16921973 | MAP3K7CL     | 4.29 | 5.13 | 2.92 | 4.54 | 1.790 | 3.059 |
| 17065630 | MIR597       | 2.67 | 3.52 | 3.33 | 4.98 | 1.797 | 3.140 |
| 16764833 | KRT83        | 0.95 | 1.81 | 1.34 | 2.13 | 1.808 | 1.730 |
| 16864934 | ZNF525       | 2.47 | 3.32 | 1.90 | 3.26 | 1.813 | 2.566 |

|          |           |      |      |      |      |       |       |
|----------|-----------|------|------|------|------|-------|-------|
| 16822265 |           | 3.44 | 4.30 | 3.02 | 3.83 | 1.825 | 1.747 |
| 16875862 | ZSCAN5A   | 4.56 | 5.44 | 4.75 | 6.06 | 1.834 | 2.478 |
| 16816895 |           | 5.25 | 6.12 | 6.45 | 7.39 | 1.834 | 1.918 |
| 16824899 |           | 5.25 | 6.12 | 6.45 | 7.39 | 1.834 | 1.918 |
| 16824980 |           | 5.25 | 6.12 | 6.45 | 7.39 | 1.834 | 1.918 |
| 16818543 |           | 1.54 | 2.42 | 1.17 | 2.62 | 1.848 | 2.718 |
| 16770780 |           | 2.87 | 3.76 | 5.26 | 6.16 | 1.854 | 1.869 |
| 16913664 |           | 2.44 | 3.33 | 2.56 | 4.02 | 1.857 | 2.759 |
| 17118390 | MGC24103  | 2.95 | 3.85 | 4.05 | 4.90 | 1.861 | 1.795 |
| 16993286 |           | 1.46 | 2.38 | 1.45 | 2.39 | 1.890 | 1.921 |
| 16975456 |           | 2.63 | 3.57 | 2.44 | 3.85 | 1.912 | 2.673 |
| 16696612 |           | 0.98 | 1.92 | 1.09 | 2.00 | 1.912 | 1.880 |
| 17118734 |           | 0.98 | 1.92 | 1.09 | 2.00 | 1.912 | 1.880 |
| 16898108 | SNORA70B  | 3.60 | 4.54 | 3.60 | 5.02 | 1.912 | 2.676 |
| 17005991 |           | 0.62 | 1.56 | 1.21 | 2.32 | 1.918 | 2.149 |
| 16714341 |           | 2.95 | 3.89 | 3.36 | 5.30 | 1.918 | 3.848 |
| 16797978 |           | 1.03 | 1.98 | 1.31 | 2.25 | 1.929 | 1.913 |
| 16761502 | TAS2R14   | 5.18 | 6.14 | 5.20 | 6.23 | 1.935 | 2.050 |
| 17036177 |           | 1.25 | 2.21 | 1.61 | 2.83 | 1.938 | 2.330 |
| 16960149 | PLSCR4    | 3.03 | 3.99 | 4.00 | 4.85 | 1.943 | 1.800 |
| 17022916 | FRK       | 1.96 | 2.92 | 3.74 | 4.79 | 1.946 | 2.073 |
| 17013195 |           | 1.77 | 2.73 | 1.38 | 2.16 | 1.948 | 1.712 |
| 17119472 |           | 1.77 | 2.73 | 1.38 | 2.16 | 1.948 | 1.712 |
| 17114470 | CT45A6    | 0.94 | 1.90 | 1.89 | 3.32 | 1.952 | 2.692 |
| 17123334 |           | 2.32 | 3.29 | 1.64 | 3.25 | 1.960 | 3.066 |
| 16763215 |           | 4.53 | 5.51 | 0.77 | 3.38 | 1.973 | 6.078 |
| 17020748 | KHDC1L    | 3.32 | 4.30 | 3.60 | 4.36 | 1.977 | 1.702 |
| 16861553 | ZNF570    | 5.28 | 6.27 | 2.93 | 3.71 | 1.986 | 1.714 |
| 17112187 | MIR421    | 5.00 | 6.01 | 5.87 | 6.65 | 2.002 | 1.711 |
| 16739229 |           | 2.71 | 3.71 | 2.40 | 4.35 | 2.012 | 3.842 |
| 17011939 | FAM26F    | 0.98 | 1.99 | 1.36 | 3.22 | 2.013 | 3.616 |
| 17111545 | MTRNR2L10 | 0.79 | 1.82 | 1.18 | 2.59 | 2.044 | 2.649 |
| 17050000 |           | 0.65 | 1.68 | 0.77 | 1.58 | 2.051 | 1.755 |
| 16716525 | CPEB3     | 3.35 | 4.39 | 3.83 | 4.70 | 2.054 | 1.836 |
| 16797834 |           | 0.92 | 1.98 | 1.25 | 3.20 | 2.085 | 3.862 |
| 16686536 | RPS15AP10 | 3.87 | 4.93 | 4.53 | 5.51 | 2.086 | 1.968 |
| 16732788 |           | 0.15 | 1.22 | 0.59 | 1.40 | 2.100 | 1.748 |
| 17118228 | HLA-E     | 2.38 | 3.45 | 1.22 | 2.09 | 2.109 | 1.826 |
| 17118232 | HLA-E     | 2.38 | 3.45 | 1.22 | 2.09 | 2.109 | 1.826 |

|          |              |      |      |      |      |       |       |
|----------|--------------|------|------|------|------|-------|-------|
| 17118242 | HLA-E        | 2.38 | 3.45 | 1.22 | 2.09 | 2.109 | 1.826 |
| 17118246 | HLA-E        | 2.38 | 3.45 | 1.22 | 2.09 | 2.109 | 1.826 |
| 17078399 |              | 0.43 | 1.52 | 2.17 | 3.78 | 2.122 | 3.066 |
| 16705747 |              | 1.01 | 2.10 | 0.66 | 2.20 | 2.125 | 2.909 |
| 17125892 |              | 3.98 | 5.08 | 3.88 | 4.82 | 2.144 | 1.913 |
| 17125914 |              | 3.98 | 5.08 | 3.88 | 4.82 | 2.144 | 1.913 |
| 17007603 | MIR3934      | 0.83 | 1.94 | 1.18 | 2.29 | 2.158 | 2.161 |
| 17064088 |              | 0.76 | 1.88 | 0.54 | 1.60 | 2.166 | 2.074 |
| 17119680 |              | 0.76 | 1.88 | 0.54 | 1.60 | 2.166 | 2.074 |
| 16992622 | MSX2         | 2.86 | 3.98 | 2.26 | 3.17 | 2.170 | 1.887 |
| 17065040 |              | 3.46 | 4.58 | 2.12 | 3.68 | 2.171 | 2.949 |
| 17059352 |              | 0.93 | 2.06 | 1.64 | 2.50 | 2.185 | 1.820 |
| 16917543 |              | 1.00 | 2.12 | 0.38 | 1.15 | 2.185 | 1.711 |
| 16835045 | LRRC37A      | 3.74 | 4.87 | 3.96 | 4.83 | 2.201 | 1.837 |
| 17123102 |              | 1.54 | 2.68 | 4.46 | 5.55 | 2.202 | 2.137 |
| 16688162 |              | 0.62 | 1.77 | 0.71 | 2.48 | 2.224 | 3.422 |
| 16662749 |              | 2.30 | 3.46 | 1.67 | 2.93 | 2.226 | 2.388 |
| 16908478 |              | 1.10 | 2.26 | 1.30 | 2.24 | 2.233 | 1.909 |
| 16727322 |              | 4.10 | 5.29 | 6.98 | 7.82 | 2.282 | 1.798 |
| 16872528 | CYP2A7       | 1.63 | 2.83 | 1.17 | 2.07 | 2.303 | 1.865 |
| 16793674 |              | 4.55 | 5.78 | 1.12 | 1.94 | 2.341 | 1.772 |
| 16902809 | LOC100216479 | 0.84 | 2.07 | 0.96 | 2.28 | 2.342 | 2.486 |
| 16733591 |              | 2.15 | 3.41 | 1.79 | 2.91 | 2.396 | 2.177 |
| 17064600 |              | 3.22 | 4.48 | 4.69 | 5.73 | 2.401 | 2.057 |
| 17118222 |              | 1.24 | 2.53 | 1.09 | 2.45 | 2.447 | 2.572 |
| 16691877 |              | 1.44 | 2.73 | 5.47 | 6.24 | 2.451 | 1.708 |
| 16692446 |              | 1.44 | 2.73 | 5.47 | 6.24 | 2.451 | 1.708 |
| 16668815 |              | 1.37 | 2.67 | 3.56 | 5.20 | 2.468 | 3.111 |
| 16994424 |              | 5.59 | 6.89 | 1.78 | 3.48 | 2.474 | 3.256 |
| 17126014 |              | 1.07 | 2.40 | 0.98 | 2.33 | 2.513 | 2.543 |
| 16826102 |              | 3.11 | 4.44 | 2.68 | 4.03 | 2.516 | 2.563 |
| 16870746 | ZNF506       | 3.82 | 5.16 | 1.60 | 2.99 | 2.533 | 2.635 |
| 17095177 |              | 0.74 | 2.16 | 0.92 | 2.14 | 2.677 | 2.336 |
| 16842143 | FAM106A      | 0.82 | 2.25 | 0.76 | 1.84 | 2.696 | 2.113 |
| 17020520 | LGSN         | 1.14 | 2.62 | 1.78 | 4.02 | 2.796 | 4.727 |
| 16994209 |              | 1.10 | 2.60 | 0.73 | 1.77 | 2.829 | 2.059 |
| 16805942 | GOLGA8DP     | 0.93 | 2.45 | 0.75 | 1.75 | 2.860 | 1.996 |
| 16720728 | LOC100505570 | 2.34 | 3.87 | 2.17 | 3.88 | 2.891 | 3.275 |
| 17119960 |              | 2.57 | 4.12 | 3.70 | 5.26 | 2.930 | 2.946 |

|          |          |      |      |      |      |        |       |
|----------|----------|------|------|------|------|--------|-------|
| 17125102 |          | 0.97 | 2.57 | 1.16 | 2.03 | 3.019  | 1.820 |
| 16879476 |          | 0.72 | 2.39 | 1.58 | 2.94 | 3.175  | 2.576 |
| 17011812 |          | 2.13 | 3.84 | 1.88 | 4.28 | 3.273  | 5.262 |
| 16747150 |          | 2.52 | 4.25 | 3.07 | 4.25 | 3.326  | 2.266 |
| 16888801 |          | 1.00 | 2.81 | 1.57 | 4.00 | 3.489  | 5.379 |
| 17070379 |          | 0.56 | 2.36 | 1.05 | 2.02 | 3.494  | 1.948 |
| 16853472 |          | 4.05 | 5.88 | 1.08 | 2.00 | 3.556  | 1.891 |
| 17043586 |          | 1.07 | 2.92 | 1.74 | 3.94 | 3.609  | 4.604 |
| 17029100 |          | 2.21 | 4.15 | 1.88 | 2.84 | 3.837  | 1.947 |
| 17041881 |          | 2.21 | 4.15 | 1.88 | 2.84 | 3.837  | 1.947 |
| 16917434 |          | 0.68 | 2.64 | 2.33 | 3.41 | 3.896  | 2.115 |
| 16827592 |          | 1.91 | 3.92 | 2.80 | 3.63 | 4.031  | 1.786 |
| 17079906 |          | 3.36 | 5.42 | 6.08 | 6.86 | 4.166  | 1.718 |
| 17005884 | OR2B6    | 2.03 | 4.09 | 1.92 | 2.78 | 4.172  | 1.813 |
| 17117888 | ZEB2     | 1.98 | 4.05 | 3.16 | 4.25 | 4.201  | 2.136 |
| 16904484 | SNORA70F | 0.82 | 3.00 | 1.37 | 2.72 | 4.515  | 2.544 |
| 16895952 |          | 1.99 | 4.19 | 1.77 | 3.39 | 4.586  | 3.073 |
| 17106679 |          | 1.52 | 3.79 | 2.36 | 3.55 | 4.829  | 2.286 |
| 17119386 |          | 1.03 | 3.66 | 0.72 | 1.73 | 6.200  | 2.020 |
| 16968521 | MIR4451  | 0.99 | 4.37 | 0.72 | 1.63 | 10.397 | 1.887 |

**Supplementary Table S5: Cell cycle related genes down-regulated after *LINC00857* siRNA knock down in both H1299 and H838 cells**

|         |
|---------|
| CCNE1   |
| CDK2    |
| CTCF    |
| G0S2    |
| MAP3K8  |
| MAPK12  |
| PPP1CC  |
| PPP3CA  |
| RBBP8   |
| SETD8   |
| SKA1    |
| SPIN1   |
| TP53BP2 |
| UHMK1   |

**Supplementary Table S6 : Pearson correlation of *Linc00857* and *CCNE1* and *CDK2* in primary lung adenocarcinomas**

|                 | <i>n</i> | CCNE1 | <i>p</i> | CDK2 | <i>p</i> |
|-----------------|----------|-------|----------|------|----------|
| Okayama data    | 226      | 0.52  | < 0.0001 | 0.46 | < 0.0001 |
| UM RNA-Seq data | 67       | 0.48  | < 0.0001 | 0.29 | 0.02     |

**Supplementary Table S7: qRT-PCR primers**

| Gene name        | Sequence |                      |  |  |  |
|------------------|----------|----------------------|--|--|--|
| <i>LINC00857</i> | Forward  | CCCCTGCTTCATTGTTTCCC |  |  |  |
|                  | Reverse  | AGCTTGTCTTCTTGGGTACT |  |  |  |

**Supplementary Table S8: siRNA**

| Gene name   | Sequence  |                       |  |  |  |
|-------------|-----------|-----------------------|--|--|--|
| LINC00857-1 | sense     | GGUAAGGGAAGGUGGAGAAUU |  |  |  |
|             | antisense | UUCUCCACCUUCCCUUACCUU |  |  |  |
| LINC00857-2 | sense     | GGCUAUGUGCUGUGAACAAUU |  |  |  |
|             | antisense | UUGUUCACAGCACAUAGCCUU |  |  |  |
